1 **HMGB1 mediates the development of tendinopathy due to**  
2 **mechanical overloading**

3 Guangyi Zhao<sup>1</sup>, Jianying Zhang<sup>1</sup>, Daibang Nie<sup>1</sup>, Yiqin Zhou<sup>1,4</sup>, Feng Li,<sup>1</sup> Kentaro Onishi<sup>3</sup>,  
4 James H-C. Wang<sup>1,2,3, \*</sup>

5  
6 <sup>1</sup>MechanoBiology Laboratory, Department of Orthopaedic Surgery

7 <sup>2</sup>Department of Bioengineering

8 <sup>3</sup>Department of Physical Medicine and Rehabilitation

9 University of Pittsburgh, Pittsburgh, PA, USA

10 <sup>4</sup>Joint Surgery and Sports Medicine Department, Shanghai Changzheng Hospital, Second  
11 Military Medical University, 415 Fengyang Road, Huangpu, Shanghai 200003, China.

**\*Correspondence to:**

James H-C. Wang, PhD

E1640, BST, 210 Lothrop Street

Pittsburgh, PA 15213

Tel: 412-648-9102; Email: [wanghc@pitt.edu](mailto:wanghc@pitt.edu)

12

13 **RUNNING TITLE: HMGB1 mediates tendinopathy development**

## 14 **Abstract**

15 Mechanical overloading is a major cause of tendinopathy, but the underlying pathogenesis of  
16 tendinopathy is unclear. Here we report that high mobility group box1 (HMGB1) is released to  
17 the tendon extracellular matrix and initiates an inflammatory cascade in response to mechanical  
18 overloading in a mouse model. Moreover, administration of glycyrrhizin (GL), a naturally  
19 occurring triterpene and a specific inhibitor of HMGB1, the tendon's inflammatory reactions.  
20 Also, while prolonged mechanical overloading in the form of long-term intensive treadmill  
21 running induces Achilles tendinopathy in mice, administration of GL completely blocks the  
22 tendinopathy development. Additionally, mechanical overloading of tendon cells *in vitro* induces  
23 HMGB1 release to the extracellular milieu, thereby eliciting inflammatory and catabolic  
24 responses as marked by increased production of prostaglandin E<sub>2</sub> (PGE<sub>2</sub>) and matrix  
25 metalloproteinase-3 (MMP-3) in tendon cells. Application of GL abolishes the cellular  
26 inflammatory/catabolic responses. Collectively, these findings point to HMGB1 as a key  
27 molecule that is responsible for the induction of tendinopathy due to mechanical overloading  
28 placed on the tendon.

29 **Keywords:** Mechanical overloading, HMGB1, tendinopathy, tendon inflammation, tendon  
30 degeneration, glycyrrhizin

31

## 32 **Introduction**

33

34           Tendinopathy, a debilitating chronic tendon disorder, is manifested in clinical settings by  
35 a combination of pain, swelling, compromised tendon structure, and rupture (1). Tendinopathy,  
36 which involves tendon inflammation and degeneration, affects healthy individuals during their  
37 active and productive years of life resulting in tremendous healthcare costs and economic impact  
38 due to work-loss (2, 3). In particular, insertional tendinopathy, which is common in young  
39 athletes, often occurs in the tendon proper proximal to the insertion into the heel bone and  
40 accounts for about 20% of Achilles tendon disorders (4). It is well established that while normal  
41 physiological loading is essential for tendon homeostasis, mechanical overloading induces the  
42 development of tendinopathy, characterized by disorganized matrix, reduced numbers and  
43 rounding of tendon cells, fibrocartilaginous change, and neovascularization (5, 6). A current  
44 concept on the mechanisms of tendinopathy is that repetitive loading may lead to a  
45 mechanobiological over-stimulation of tendon cells resulting in an imbalance between the  
46 synthesis and breakdown of matrix proteins, especially collagen (7-9). The resulting mismatch is  
47 a continuous loss of collagen in the tendon by repetitive loading with insufficient recovery time,  
48 which initiates a catabolic degenerative response that leads to tendinopathy (6, 10).

49

50           It is now recognized that inflammation is part of tendinopathy and could lead to tendon  
51 degeneration that occurs at late stages of tendinopathy (11-13). Under excessive mechanical  
52 loading, abnormal levels of proinflammatory mediators may be released triggering inflammatory  
53 reactions and resulting in severe pain in tendon. PGE<sub>2</sub>, an enzymatic product of cyclooxygenase-

54 2 (COX-2), is an established potent lipid mediator of inflammation and pain in tendinopathy  
55 (14). Previously, we showed that COX-2 and PGE<sub>2</sub> are produced at abnormally high levels in  
56 tendons and by tendon cells subjected to mechanical overloading (15-17). Such an abnormal  
57 increase in PGE<sub>2</sub> levels plays an important part in tendon inflammation (15, 18), which can lead  
58 to tendon degeneration characterized by hypercellularity, angiogenesis, and abnormal  
59 arrangement of collagen fibers thus impairing the structure and function of tendons (17, 19, 20).  
60 Additionally, failure to regulate specific MMP activities in response to repeated mechanical  
61 loading accelerates tendon degeneration (21). Nevertheless, the identity of the molecular  
62 mediators through which mechanical overloading triggers the production of these  
63 inflammatory/catabolic mediators that eventually leads to tendinopathy remains largely  
64 unknown.

65

66 As a non-histone nuclear protein, HMGB1 is recognized as an endogenous danger  
67 signaling molecule that triggers inflammatory responses when released into the extracellular  
68 milieu. While HMGB1 is present in the nuclei of almost all cells where it regulates DNA  
69 stability and gene expression (22, 23), it can be released from a variety of cells especially  
70 macrophages as a result of an active process in live cells, or passively released from stressed,  
71 injured and necrotic cells (24). Indeed, mechanical loading *in vitro* or *in vivo* induces HMGB1  
72 release from ligament cells to the extracellular matrix (ECM) and participates in the  
73 inflammation process and tissue remodeling by modifying the local microenvironment (25, 26).  
74 In short, once released, HMGB1 induces and maintains an inflammatory response (27-30).  
75 Extracellular HMGB1 acts as an inflammatory mediator and triggers an inflammation cascade  
76 inducing the production of IL-1 $\beta$ , IL-6, and TNF- $\alpha$  (31, 32). HMGB1 also maintains that

77 response by inducing its own release from monocytes and macrophages (33). Extracellular  
78 HMGB1 plays a key pathogenic role in many major diseases such as cancer, stroke,  
79 endotoxemia, and joint disorders (34, 35). Although extensive literature is available on the  
80 inflammatory role of HMGB1 in fibrosis and other diseases (31), only limited studies have  
81 linked HMGB1 to tendinopathy. Millar *et al.* have suggested a new mechanistic role of alarmins  
82 such as HSP70 in initiating inflammation in early stage tendinopathy (36). They also indicated  
83 that HMGB1 may play a pivotal role in the pathogenesis of a variety of inflammatory conditions;  
84 they further conducted a clinical study and found high levels of HMGB1 in tendinous tissues of  
85 supraspinatus tendinopathy patients (37). Increased expression of alarmins including HMGB1  
86 has also been reported in another study with a few supraspinatus tendinopathy patients (38).  
87 Recently, upregulation of HMGB1 has been associated with inflammatory responses and ECM  
88 disorganization in rat rotator cuff tendon injury model (39).

89  
90         However, whether HMGB1 mediates the development of tendinopathy due to mechanical  
91 overloading placed on the tendon is largely unknown. To determine this, we performed mouse  
92 treadmill running experiments. We report that in response to such mechanical overloading *in*  
93 *vivo*, HMGB1 was released to tendon matrix and initiated an inflammatory cascade, and this  
94 inflammation was inhibited by administration of glycyrrhizin (GL), a naturally occurring  
95 triterpene and a specific inhibitor of HMGB1. Furthermore, mechanical overloading in the form  
96 of long-term intensive treadmill running induced Achilles tendinopathy in mice, and  
97 administration of GL completely blocked the tendinopathy development. A detailed report is as  
98 follows.

99

## 100 **Materials and methods**

101

102 **Ethics Statement** - All experiments were performed in accordance with relevant

103 guidelines and regulations. All animal experiments were approved by the Institutional Animal

104 Care and Use Committee of University of Pittsburgh (IACUC protocol #17019968).

105

## 106 **Mouse treadmill running experiments**

### 107 **1) Short term treadmill running experiments with various intensities**

108 In total, 48 female C57B6/L mice (3 months old) were used for the *in vivo* treadmill  
109 running experiments and were divided into 4 groups with 12 mice in each group. The control  
110 mice remained in cages and were allowed cage activities. The remaining three groups ran on the  
111 horizontal treadmill but at different intensities; i) moderate treadmill running (MTR), ii)  
112 intensive treadmill running (ITR), and iii) one-time treadmill running (OTR). The running speed  
113 for all regimens was 15 meters/min. In the first week, mice were trained for 15 min to  
114 accommodate them to the treadmill running protocol and environment. In the following 3 weeks,  
115 mice in the MTR group ran for 50 min and those in the ITR group ran for 3 hrs a day, 5 days a  
116 week. Mice in the OTR ran for more than 5 hrs until fatigue. Performance of the mice (i.e.,  
117 running time) was recorded to recommend inclusive/exclusive criteria. Immediately after  
118 running, the Achilles and patellar tendons were harvested from four groups of mice. Half of the  
119 tendon samples were used for ELISA and the remaining half was used for immunostaining.

120

## 121        **2) Short term intensive treadmill running (ITR) with GL administration**

122            In these experiments, we used a total of 24 female C57B6/L mice (3 months old) with 6  
123 mice in each of the 4 groups; i) cage control group (Cont) where mice did not receive any  
124 treatment and served as control group with intact tendon, ii) GL injection only where mice  
125 received daily intraperitoneal (IP) injection of GL (50 mg/kg body weight, Cat # 50531, Sigma-  
126 Aldrich, St. Louis, MO), iii) ITR group where mice ran on the ITR regimen (see above *in vivo*  
127 *mouse treadmill running model* for details), and iv) ITR with GL injection (GL+ITR) group  
128 where mice received daily IP injection of GL 15 min before the beginning of ITR regimen. The  
129 dosage of GL was selected based on previous studies (40-42). After treadmill running for 3  
130 weeks, patellar and Achilles tendons were dissected out and the right and left side of each tendon  
131 from a single mouse were homogenized in T-PER buffer (Cat # 78510, ThermoFisher,  
132 Pittsburgh, PA) and the supernatants were used for ELISA to measure PGE<sub>2</sub> and MMP-3.

133

## 134        **3) Long term ITR (Lt-ITR) with GL administration**

135            This treadmill running protocol was similar to the 3-week running protocol, using a total  
136 of 24 mice divided into 4 groups. The only difference was that the Lt-ITR mice and Lt-ITR+GL  
137 mice ran a horizontal treadmill in the first 12 weeks, and then ran a 5° uphill treadmill for  
138 additional 12 weeks to increase the load on Achilles tendon to maximize the treadmill running  
139 effect. At the end of 24 weeks, all mice were sacrificed, and the Achilles tendons were dissected  
140 and used for histological and immunohistochemical (IHC) analyses.

141

142

## 143 **HMGB1-alginate beads implantation in tendon *in vivo***

144 To assess the function of HMGB1 *in vivo*, we developed a system to deliver HMGB1 into  
145 tendons *in vivo* to mimic long term release of HMGB1 induced by repetitive mechanical loading.  
146 Our delivery system consisted of a degradable polymer called alginate that contained HMGB1 to  
147 ensure local and continuous delivery of HMGB1 to maximize the effect in a relatively short  
148 period of time.

149

150 A 2% alginate solution was first prepared by dissolving alginate powder (Cat # 180947-  
151 100G, Sigma-Aldrich) in double distilled water with vigorous vortexing. Then, HMGB1 powder  
152 (Cat # H4652, Sigma-Aldrich) was added to the 2% alginate solution at the concentration of 0.5  
153 mg/ml. Using a pipette, about 5  $\mu$ l of the HMGB1-alginate solution was then added to 2 mM  
154 CaCl<sub>2</sub> solution in the form of drops, which solidified to form alginate beads. Control alginate  
155 beads were prepared without adding HMGB1. The beads were then removed from the CaCl<sub>2</sub>  
156 solution and allowed to air dry. The final diameter of the beads was around 0.5 mm, which is  
157 about 1/6 of the rat patellar tendon width. This protocol was developed in our laboratory (43).

158

159 Sprague Dawley (SD) rats (female, 6 months) were sedated by inhaling 2-3% isoflurane.  
160 The skin over the patellar tendon was then shaved, sterilized and a small incision was made on  
161 the skin to expose the tendon. HMGB1-alginate beads containing 2.5  $\mu$ g HMGB1 or blank  
162 alginate beads with the same size for control were implanted into the central part of the left and  
163 right patellar tendons. After 2 and 4 weeks, 5 rats in each group were used for hematoxylin &



164 eosin (H&E) and IHC staining to evaluate structure and compositional change in the patellar  
165 tendon tissue.

166

## 167 **ELISA for measuring HMGB1, PGE<sub>2</sub>, and MMP-3 in tendon**

168 ELISA kits were used to measure HMGB1, PGE<sub>2</sub>, and MMP-3 protein levels in  
169 tendinous tissues. Briefly, mice Achilles and patellar tendinous tissues were weighed and blunt  
170 separated with forceps and soaked in 200  $\mu$ l PBS for 24 hrs at 4°C to allow HMGB1 in the  
171 matrix to diffuse to PBS. This was done to prevent nuclear HMGB1 leaking into the extracellular  
172 space thus allowing precise quantification of HMGB1 that was released to the extracellular  
173 space. The samples were centrifuged at 2,000 g for 30 min at 4°C and the supernatants were  
174 collected to measure HMGB1 concentrations using an ELISA kit (Cat # ST 51011, Shino-Test  
175 Corporation, Tokyo, Japan) according to the manufacturer's instructions. All samples were  
176 analyzed in duplicates. To determine whether the above PBS extraction method collected  
177 HMGB1 from the tendon matrix only, we used an ELISA kit (Cat # ab156895, Abcam,  
178 Cambridge, MA) to measure the DNA concentrations in all samples lysed with 200  $\mu$ l RIPA  
179 buffer (Cat # R0278, Sigma-Aldrich).

180

181 For PGE<sub>2</sub> and MMP-3 measurements, the samples were vigorously homogenized with  
182 BioMasher Standard (Cat # 9790A, Takara, Shiga, Japan) in 200  $\mu$ l T-PER tissue protein  
183 extraction reagent instead of PBS. The samples were then centrifuged as described above and the  
184 supernatants were collected for ELISA and the concentrations were determined using ELISA kits

185 for PGE<sub>2</sub> (Cat # 514010, Cayman, Ann Arbor, Michigan) and MMP-3 (Cat # LS-F5561,  
186 Lifespan Bio, Seattle, WA).

187

## 188 **Alcian blue and nuclear fast red staining**

189 Alcian blue staining was performed using a kit (Cat # ab15066, Abcam) following the  
190 manufacturer's protocol. Briefly, glass slides with tissue on it were hydrated first and incubated  
191 in acetic acid for 3 min. The slides were incubated in Alcian blue (1% solution, pH 1.0) solution  
192 for 30 min at room temperature and then rinsed with acetic acid. They were then rinsed with  
193 running tap water for 2 min, followed by washing with two changes of distilled water. The slides  
194 were stained with Alcian blue solution for an additional 5 min, followed by rinsing with running  
195 tap water and two changes of distilled water. The slides were counterstained, dehydrated with  
196 graded alcohols, washed in with xylene and covered with cover slips.

197

198 Alcian blue and nuclear fast red dual staining was performed as follows. The tissue  
199 sections were fixed with 4% paraformaldehyde for 20 min at room temperature, and then washed  
200 three times with PBS. The slides were stained with Alcian blue as described above, then washed  
201 with water 3 times and counterstained in 0.1% nuclear fast red solution (Cat # ab146372,  
202 Abcam) for 5 min. The slides were washed with water 3 times, and dehydrated through 95%  
203 alcohol and absolute alcohol, 3 min each. The slides were finally treated with xylene and  
204 mounted with resinous mounting medium. The photographs were taken with a histology  
205 microscope. With this staining, the nuclei appear as pink to red and glycoproteins as dark blue.

206

## 207 **Immunostaining of tendinous tissue**

208 For immunostaining of tendinous tissue, Achilles and patellar tendons dissected from the  
209 mice were immediately immersed in O.C.T compound (Sakura Finetek USA Inc, Torrance, CA)  
210 in disposable molds and frozen at -80°C. Then, cryostat sectioning was performed at -25°C to  
211 obtain about 10 µm thick tissue sections, which were fixed in 4% paraformaldehyde for 15 min  
212 and blocked with universal blocking solution (Cat # 37515, ThermoFisher Scientific). The  
213 sections were then incubated with rabbit anti-mouse HMGB1 antibody (1 µg/ml, Cat # ab18256,  
214 Abcam) at 4°C overnight followed by goat anti-rabbit secondary antibody conjugated with Cy3  
215 for 1hr at room temperature (0.5 µg/ml, Cat # AP132C, Millipore, Billerica, MA), and then  
216 counterstained nuclei with Hoechst 33342. Since the purpose of this staining was to evaluate the  
217 presence of HMGB1 in the extracellular milieu, the tissue sections were not treated with Triton  
218 X-100 to block the permeation through the nuclear membrane. HMGB1 levels in each tendon  
219 sample were normalized to the corresponding tissue weight.

220

221 For CD31 and CD68 staining, patellar tendons were harvested from 3 rats that received  
222 HMGB1-alginate bead or control bead implantation and tissue sections were prepared for  
223 immunostaining as described above. Anti-rat CD31 antibody (1 µg/ml, Cat # ab64543, Abcam)  
224 was used to detect endothelial cells and vessels and anti-CD68 antibody (1 µg/ml, Cat # ab955,  
225 Abcam) was used to detect monocytes/macrophages following the same procedure as above.  
226 H&E staining was used to evaluate overall tendon structure and cell density.

227

228 For collagen II (Col II) staining, the fixed tissue sections were treated with 0.05% trypsin  
229 for 20 min at 37°C and washed with PBS three times. Then, the washed tissue sections were  
230 reacted with rabbit anti-collagen II antibody (1:500, Cat. # ab34712, Abcam) at 4°C overnight.  
231 For SOX-9 staining, the tissue sections were further treated with 0.1% of Triton X-100 for 30  
232 min at room temperature and washed with PBS another three times, then the sections were  
233 incubated with rabbit anti-SOX-9 (1:500, Cat # AB5535, Millipore) antibody at 4°C overnight.  
234 Finally, the tissue sections were washed 3 times with PBS and incubated with Cy3-conjugated  
235 goat anti-rabbit IgG antibody at room temperature for 2 hrs. Slides were then counterstained with  
236 Hoechst 33342.

237

## 238 **Statistical Analysis**

239 Wherever appropriate, student's *t*-test, or one-way ANOVA was used followed by  
240 Fisher's least significant difference (LSD) test for multiple comparisons. When P-values were  
241 less than 0.05, the two groups compared were considered to be significantly different.

## 242 **Results**

### 243 **Mechanical overloading *in vivo* induces HMGB1 release into tendon** 244 **matrix**

245 As the first goal of this study, we determined whether mechanical overloading in the  
246 form of mouse treadmill running induces the release of HMGB1 to the ECM *in vivo*. For this,  
247 first we determined the presence and localization of HMGB1 using Western blot and IHC in

248 normal tendinous tissues without mechanical loading. The Western blot results showed that  
249 HMGB1 is present in the patellar and Achilles tendinous tissues, and immunofluorescence  
250 results showed that it is localized in the nuclei, not in ECM (**S1 Fig**). After treadmill running,  
251 Achilles tendon sections of the control group (cage activity only) showed the presence of tendon  
252 cells that stained blue with Hoechst 33342, but the tendon matrix was not positively stained  
253 indicating the absence of HMGB1 in the matrix (**Fig 1A**). The tendinous tissue was cut into 10  
254  $\mu\text{m}$  thickness pieces were not penetrated with detergent to minimize staining of HMGB1 in the  
255 nucleus (a penetrated tissue staining sample is shown in **S1C Fig**). Some peripheral areas that  
256 appear red are paratenon, which surrounds the tendon proper (**Fig 1A, a, e**). In the tendon  
257 sections from mice on the MTR regimen, HMGB1 staining was absent in the tendon matrix  
258 except for the mild positive staining in the peripheral areas (**Fig 1A, b**). However, a marked  
259 increase in HMGB1 staining was observed in the mouse tendon matrix with the ITR regimen for  
260 3 weeks (**Fig 1A, c**). A 20x magnification shows clear positive staining for HMGB1 outside the  
261 tendon cells and in the tendon matrix (arrowhead, **Fig 1A, g**). The same increasing trend for  
262 HMGB1 staining was observed in the tendon matrices of mice 5-7 hrs on the OTR regimen (**Fig**  
263 **1A, d, h**). The majority of HMGB1 is detected surrounding the elongated tendon cells, which  
264 indicates HMGB1 is released by these cells.

265

266 These findings were also confirmed by ELISA measurement of *in vivo* HMGB1 levels in  
267 mouse patellar and Achilles tendon matrices (PT and AT, respectively) subjected to mechanical  
268 loading protocols (**Fig 1B, C**). Specifically, HMGB1 levels were 6.6-fold higher in Achilles  
269 tendon, and 6.8 times higher in patellar tendon of ITR group when compared to the control mice  
270 that remained in cages. HMGB1 levels were also significantly higher in the Achilles tendinous

271 tissues of OTR mice and was 3.2-fold higher when compared to the control, while patellar  
272 tendon tissues showed a 2.3-fold change compared to control but without statistical significance  
273 (**Fig 1B, C**). These results indicate that only excessive mechanical loading conditions, ITR and  
274 OTR, trigger the release of HMGB1 from the tendon cells into the tendon matrix. In order to  
275 confirm that the higher HMGB1 concentration in ITR and OTR groups is not due to massive cell  
276 destruction during sample preparation, we measured the total DNA content in all samples, and  
277 they were equivalent but significantly lower than total lysed tendon samples (**Fig 1D**).  
278 Additionally, the *in vivo* results are supported by *in vitro* cell mechanical stretching experiments;  
279 that is, mechanical overloading induces release of HMGB1 from the tendon cells to the culture  
280 media (**S2 Fig**).

281

## 282 **Short term ITR induces inflammatory cell infiltration in tendon**

283 To investigate whether intensive mechanical loading induces inflammatory cell  
284 infiltration in tendinous tissues, we performed immunostaining of Achilles tendinous tissues after  
285 MTR, ITR, and OTR with inflammatory cell marker CD68. CD68 staining was absent in the  
286 control and MTR (**Fig 2A, B**), but was detected in the Achilles tendon sections of mice on the  
287 ITR regimen (**Fig 2C**). The induction of inflammatory cell infiltration by ITR implies that  
288 HMGB1 may invoke an inflammatory reaction in tendon (arrow heads, **Fig 2C**). However, CD68  
289 was found negative in OTR regimen (**Fig 2D**). Although OTR could induce HMGB1 release  
290 within a short period of time (**Fig 1A, B**), it may not have sustained long enough to induce any  
291 inflammatory cell infiltration unless excessive mechanical loading is repeated for a prolonged  
292 period.

293 To confirm the likelihood that HMGB1 causes inflammatory response in tendon, we  
294 implanted HMGB1 in alginate beads to rat tendon and immunostained tendon sections for CD68  
295 and CD31 after 2 and 4 weeks. The H&E stain of control tendon implanted with blank beads  
296 shows no cell proliferation (**Fig 2E, a**), while tendon section with implanted HMGB1 beads  
297 shows extensive cell proliferation (highlighted in the blue box) after 2 weeks (**Fig 2E, b**). The  
298 implantation site after 4 weeks showed higher number of cells (**Fig 2E, c, arrow**) compared to  
299 control, but is much less compared to the 2 weeks group. Control did not show positive IHC  
300 stains for CD68 (**Fig 2E, d**), but positive CD68 staining in HMGB1 implanted sample for 2  
301 weeks showed inflammatory cell infiltration (**Fig 2E, e, arrows**). The four weeks implantation  
302 group showed minimal positive staining for CD68 (**Fig 2E, f**). Moreover, implantation of  
303 HMGB1 beads at two weeks resulted in the formation of vessel-like structures (**Fig 2F, a,**  
304 **arrows**). Positive IHC staining for CD31 reveals extensive angiogenesis in the group (**Fig 2F, b,**  
305 **arrow**). Collectively, these data show that under prolonged repetitive mechanical overloading  
306 conditions (ITR), HMGB1 is released into the Achilles and patellar tendon matrix, leading to  
307 hypercellularity, inflammatory cell infiltration, and angiogenesis in tendon.

308

### 309 **GL blocks HMGB1-induced tendon inflammation *in vivo***

310 To determine whether GL can negate the inflammatory effects of HMGB1 released to  
311 tendon matrix by the short term ITR regimen (3 weeks), we administrated GL to mice by IP  
312 injection on the ITR regimen 15 min before they started the treadmill running. Prior to this assay,  
313 we determined whether injected GL can be transported and remain in the tendon region after  
314 injections. Quantification of GL using thin layer chromatography 3 hrs after injection showed  
315 significant levels of GL in mouse patellar and Achilles tendons (**S3 Fig**). GL injection into

316 control mice did not alter the PGE<sub>2</sub> levels when compared to the mice without injection (**Fig**  
317 **3A**). However, PGE<sub>2</sub> levels were significantly higher in ITR mouse tendons. Specifically,  
318 measurement by ELISA showed 1.5 and 1.6-fold increase in AT and PT, respectively, compared  
319 to control mouse tendons after an ITR regimen. However, daily GL injection prior to ITR  
320 inhibited PGE<sub>2</sub> production (**Fig 3A**). Similar effects were observed with MMP-3 levels in mouse  
321 tendons after GL injections. MMP-3 levels were significantly elevated in ITR group (1.9 and  
322 1.8-fold increase compared to control), but GL negated the enhanced MMP-3 production (**Fig**  
323 **3B**). While statistically not significant, the MMP-3 levels in GL+ITR group appeared to be  
324 higher than the control group. Collectively, these results suggest that injection of GL, an  
325 inhibitor of HMGB1, reduces inflammation marked by high levels of PGE<sub>2</sub> in tendon *in vivo*.  
326 These results are supported by the *in vitro* data, which showed that exogenous HMGB1 induced  
327 high levels of PGE<sub>2</sub> and MMP-3 production in tendon cells, and GL inhibited the inductions (**S4**  
328 **Fig**).

329

### 330 **Long term-ITR for 12 weeks induces tendinopathy at the tendinous** 331 **tissue proximal to tendon insertion site**

332 Having established that a short term ITR (3 weeks) induces inflammatory responses in  
333 tendon, we next investigated the effect of Long term-ITR (Lt-ITR) on tendinopathy development  
334 in mouse Achilles tendon. After 12 weeks of ITR, no obvious structural and compositional  
335 changes were found in the middle 1/3 section in Achilles tendon, but the histological analysis at  
336 the tendinous tissue near the tendon insertion site revealed typical tendinopathic changes  
337 including change in cell shape, accumulation of GAG, and increase in SOX-9 staining (**Fig 4A-**



338 **B)**. Normal tendon cells in control group are tightly packed in the collagen tissue are largely  
339 spindle shaped (**Fig 4A, a-c**). However, many of the cells in Lt-ITR mouse Achilles tendon were  
340 round with lacunae around the cells, which is a typical chondrocyte appearance (**Fig 4A, d-f**).  
341 Semi-quantification of the percentage of round cells near the end site of Achilles tendon showed  
342 around 30% of cells are round with cartilage lacunae (**Fig 4A, g**). Also, there is minimal GAG in  
343 the normal tendon (**Fig 4A, a-c**), while Lt-ITR induced significant GAG accumulation (**Fig 4A,**  
344 **d-f**). Additionally, there were no round cells or SOX-9 staining in the control (**Fig 4B, a, b**),  
345 while some of those round shaped cells in Lt-ITR mouse tendon were positive for SOX-9 (**Fig**  
346 **4B, c, d**). Semi-quantification revealed that about 20% of the cells in 12-week Lt-ITR mouse  
347 tendons near the insertion site were positive for SOX-9 (**Fig 4B, e**).

348

## 349 **Long term-ITR for 24 weeks induces tendinopathy and** 350 **administration of GL prevents tendinopathy development**

351 The above findings indicate that 12 weeks of Lt-ITR induces the development of  
352 insertional Achilles tendinopathy. Therefore, we decided to extend the treadmill running period  
353 to 24 weeks to maximize the tendinopathic effects on mice while testing the inhibitory effect of  
354 GL on HMGB1 in preventing Achilles tendinopathy. We first checked the presence of HMGB1  
355 in the tendon matrix near the insertion site. HMGB1 was not present in the control or GL only  
356 treated group as expected, but HMGB1, as well as CD68, was present in the tendon matrices of  
357 the mice after 24 weeks of Lt-ITR (**S5 Fig**). In order to closely evaluate the Lt-ITR effect and  
358 GL inhibitory effect, we divided the Achilles tendon near the insertion site into two areas, the  
359 proximal region (~300  $\mu$ m from the end of tendon tissue), which belongs to Achilles tendinous  
360 tissue (**Figs 5, 6**, yellow boxes), and the distal region (**Figs 5, 6**, green boxes) next to the tendon-

361 bone insertion, which is very near the end of the tendon tissue that is considered as part of  
362 transitional zone between tendon and heel bone. We found that a small number of chondrocyte-  
363 like cells exist in the distal region in the control group. With this in mind, we focused on the  
364 proximal region since it represents the site of degenerative changes in tendon rather than the  
365 region of possible pre-existing chondrocyte-like cells.

366

367 We found that after 24 weeks of Lt-ITR, the proximal site of Achilles tendon contained  
368 cells with round shape (arrowheads in **Fig 5A, g**), compared to more elongated cells in the cage  
369 control and GL treatment group alone groups (**Fig 5A, e, f**). However, in Lt-ITR mice treated  
370 with daily injection of GL, no change in cell shape was observed (**Fig 5A, h**). In addition, in  
371 these Lt-ITR mice, extensive GAG staining in the tendon was present. Such GAG accumulation  
372 was prevented by GL administration in the group (**Fig 5B, bottom panel**). Also, Lt-ITR induced  
373 the expression of chondrogenic markers (SOX-9 and Col II) in Achilles tendon, and GL inhibited  
374 the expression of SOX-9 and Col II confirmed by immunofluorescence staining (**Fig 6A, B,**  
375 **bottom panel**). Collectively, these findings suggest that Lt-ITR for 24 weeks induces  
376 degenerative changes, typical of insertional tendinopathy at the proximal site of Achilles tendon,  
377 and that injections of GL blocks the tendon's degenerative changes due to mechanical  
378 overloading on the tendon.

379

## 380 **Discussion**

381 Tendinopathy affects large populations in both athletic and occupational settings.  
382 Management of this tendon disorder is an ongoing challenge due to lack of understanding of the

383 precise molecular mechanisms underlying the development of tendinopathy (44, 45).  
384 Inflammation is thought to be a major contributor to the development of tendinopathy (11, 46).  
385 Previously, we have shown that excessive mechanical loading induces inflammatory mediator  
386 PGE<sub>2</sub> in tendon cells and tissues (15, 17). A few other studies have shown that upregulation of  
387 HMGB1 is associated with shoulder tendon injury/tendinopathy in patients and indicated that it  
388 would be a valuable target for tendinopathy management (37-39, 47). In this study, we extend  
389 these investigations to examine the role of HMGB1, an inflammatory alarmin molecule, in  
390 tendinopathy development due to mechanical overloading conditions. We show that HMGB1 is  
391 released to the extracellular space of tendon cells under mechanical overloading conditions  
392 thereby eliciting the cells' inflammatory and catabolic responses marked by elevated PGE<sub>2</sub>, and  
393 MMP-3 production in a rodent model. Moreover, we show that by daily IP injection, GL reduces  
394 the inflammatory/catabolic reactions marked by high levels of production in PGE<sub>2</sub> and MMP-3,  
395 in overloaded mouse tendons *in vivo*. Finally, GL administration in mice that underwent long  
396 term intensive treadmill running blocks the development of degenerative tendinopathy  
397 characterized by the presence of chondrocyte-like cells, accumulation of proteoglycans,  
398 chondrogenic marker SOX-9 expression, and high levels of collagen type II production.  
399

400 Although the presence of inflammation in tendinopathic tendons is highly debated, the  
401 contribution of immune cells and inflammatory mediators to tendinopathy development are  
402 increasingly recognized. Recent investigations in human tissues and cells from tendinopathic  
403 patients strongly support that inflammation is involved in tendinopathy (11-13). Infiltration of  
404 inflammatory cells like macrophages and mast cells has been reported in early supraspinatus  
405 tendinopathy patients (11). Tendinopathy may not progress through a classic inflammatory

406 pathway but may rather involve a local sterile inflammation initiated by overloaded and damaged  
407 cells that could release molecules functioning as danger signals. Alarmins including HMGB1 are  
408 implicated as key effectors in the activation of immune system that may be important in the  
409 pathogenesis of tendinopathy (36). However, there is limited data regarding the potential role of  
410 HMGB1 in tendinopathy development. By using *in vivo* and *in vitro* models, we show for the  
411 first time that HMGB1 induces inflammatory reactions in tendon cells and tendon matrix, a  
412 hallmark of early stages of tendinopathy, and injection of HMGB1 inhibitor, GL, abolishes the  
413 development of degenerative tendinopathy.

414

415         Recent findings with clinical samples of tendinopathy indicate that HMGB1 is present  
416 and likely plays an important role in driving early stages of tendinopathy (11). The tissue and  
417 cells derived from tendinopathic and ruptured Achilles tendons show evidence of chronic (non-  
418 resolving) inflammation (13). Additional clinical studies support this finding showing enhanced  
419 levels of HMGB1 in early stage supraspinatus tendinopathy tissues compared to normal tissues  
420 and late stage tendinopathy tissues (37, 38). Moreover, the *in vitro* study shows that recombinant  
421 HMGB1 induces significant inflammatory mediators such as IL-1 $\beta$ , IL-6, IL-33, CCL2, and  
422 CXCL-12 (37). The findings of this study further links HMGB1 with the inflammatory responses  
423 induced by mechanical overloading of tendon to the developmental course of tendinopathy. In  
424 other organs, once released following trauma or severe cellular stress thereby triggering sterile  
425 inflammation in injured tissues, HMGB1 is implicated as a causative factor in many diseases, *i.e.*  
426 sepsis, rheumatic arthritis, pancreatitis, ischemia-reperfusion injury, and gastrointestinal  
427 disorders (34, 48). Inhibiting HMGB1 using anti-HMGB1 neutralizing antibody attenuated the  
428 development of pancreatitis and associated organ dysfunction (49). Blocking HMGB1 activity is

429 therapeutic in arthritis, because administration of either anti-HMGB1 or A-box of HMGB1 in  
430 collagen type II-induced arthritis significantly attenuated the severity of disease (50). Thus,  
431 HMGB1 may represent a new target of therapy of inflammation-related diseases such as  
432 tendinopathy. This is supported by the finding that use of GL, a specific inhibitor of HMGB1,  
433 suppresses inflammatory responses as defined by PGE<sub>2</sub> in tendon cells and prevents  
434 tendinopathy development.

435

436 In this study, HMGB1 was shown to be released into tendon matrix in response to  
437 mechanical overloading conditions (ITR). But the exact “release modes” are not clear. The  
438 HMGB1 may be actively released by tendon cells due to excessive mechanical stress on the  
439 cells, as suggested by *in vitro* data of this study; or it may be from passive release by loading-  
440 induced cellular necrosis. Additionally, macrophage/monocytes recruited to tendon tissue during  
441 overloading may also release HMGB1. All “release modes,” would lead to inflammatory  
442 responses in tendon matrix.

443

444 It is known that HMGB1 acts as a chemoattractant in various cell types like  
445 macrophages, neutrophils, mesoangioblasts, and osteoclasts (33, 34). Our study also  
446 demonstrates this well-known property of HMGB1 in tendons. After initial tendon microinjury  
447 by repetitive mechanical over loading such as long-term intensive treadmill running in this study,  
448 inflammation can occur with influx of white blood cells, and HMGB1 by its chemoattractant  
449 property may recruit neutrophils, monocytes, and macrophages to sites of injury. While  
450 exploring the HMGB1 effect *in vitro*, we found that this mediator did promote tendon cell

451 migration and inflammatory reactions but did not induce their proliferation (data not shown).  
452 Interestingly, in the HMGB1 implantation experiment, HMGB1 induced hypercellularity in  
453 tendon tissues (**Fig 2E**). It is likely that HMGB1 exerts its function by recruiting inflammatory  
454 cells to the “injury site”, and then initiates the release of cytokines (e.g. IL-6, IL-1 $\beta$ , IL-6, and  
455 IL-8) from the inflammatory cells. This should be investigated in future studies.

456

457 In this study, we used GL to inhibit HMGB1-induced inflammation as defined by PGE<sub>2</sub>  
458 in contrast to inflammatory markers such as IL-1 $\beta$ , IL-6, and IL-8, since clinically, inflammation  
459 reduction is achieved by using non-steroidal anti-inflammatory drugs (NSAIDs), which inhibit  
460 COX and as a result, reduce PGE<sub>2</sub>. Moreover, the amplification of the PGE<sub>2</sub> biosynthesis  
461 pathway by HMGB1/IL-1 $\beta$  is suggested as an important pathogenic mechanism perpetuating  
462 inflammatory and destructive activities in rheumatoid arthritis (51). While it is currently unclear  
463 whether our findings will reflect the actual mechanisms of tendinopathy development and  
464 treatment in humans, recent studies demonstrated that HMGB1 is present in human  
465 tendinopathic tendons and regulates cellular inflammation and protein production *in vitro* (37,  
466 38). This suggests that HMGB1 plays a similar role in the development of tendinopathy due to  
467 mechanical overloading.

468

469 The specific inhibitor of HMGB1, glycyrrhizin (GL), is a natural glyco-conjugated  
470 triterpene present in licorice plant. It blocks prostaglandin production and inflammation (52).  
471 Topically, it has been in use for the treatment of tendinitis, bursitis, and gum inflammation. It has  
472 been used in preclinical investigations to inhibit HMGB1 signaling to treat inflammation in lung

473 and liver diseases (42). GL has a long history of well-known anti-inflammatory effects (53-55),  
474 and studies show that it can inhibit the chemoattractant and mitogenic activity of HMGB1 by  
475 direct binding (52, 56). It has also been administered to patients with hepatitis B and C and is  
476 considered to be safe for human consumption (52, 57, 58), but GL may have off-target effects  
477 other than inhibition of HMGB1. The side effect of GL is mainly from its metabolic product  
478 glycyrrhetic acid after oral ingestion and catalyzed by bacteria in gut(59), which is irrelevant to  
479 IP injection of GL that we used in this study. Therefore, GL is safe for *in vivo* use and has  
480 minimal off-target effects when IP injection is used for GL delivery.

481

482         Based on the findings in this study, we propose a pathological tendinopathy model  
483 focusing on the role of HMGB1 in tendinopathy development and the subsequent degenerative  
484 changes. Mechanical overloading of tendon results in micro-tears of tendon matrix and/or tendon  
485 cells, and as a result HMGB1 is released from stressed or injured tendon cells. The  
486 extracellularly released HMGB1 attracts inflammatory cells (e.g. macrophages) to the injury site,  
487 and they release inflammatory cytokines. The resident tendon cells are also activated and shift to  
488 a pro-inflammatory phenotype. The proliferation of tenocytes, ingrowth of blood vessels, and  
489 destruction of well-organized collagen matrix, result in compromised mechanical property of the  
490 tendon that is vulnerable to even normal mechanical loading. Due to the persistence of the  
491 overloading, as opposed to one-time or modest loading, the inflammation status does not get  
492 resolved but rather gets amplified. As a consequence, chronic sterile inflammation persists in  
493 tendon tissue, which leads to degenerative changes that eventually lead to the development of  
494 full-blown tendinopathy. Our previous studies showed that PGE<sub>2</sub> treatment induced non-  
495 tenogenic differentiation of tendon stem cells into adipocyte, chondrocyte, and osteocytes both *in*

496 *vivo* and *in vitro* (17, 60), and these studies help to explain how chronic inflammation may result  
497 in a chondrogenic phenotype change in our treadmill running overloading model.

498

499 In conclusion, our results support that HMGB1 released to tendon matrix due to  
500 mechanical overloading induces tendinopathy development by initiation of tendon inflammation  
501 and eventual tendon degeneration. These results provide evidence for the role of HMGB1 as a  
502 therapeutic target to prevent tendinopathy before its onset and block further development at its  
503 early inflammation stages. The inhibition of tendinopathy development by GL administration in  
504 this study also suggests that GL may be used as a therapeutic agent to prevent tendinopathy  
505 development.

506

## 507 **Acknowledgements**

508 We thank Dr. Bhavani P Thampatty and Dr. Huiyan Wu for their assistance in the preparation of  
509 this manuscript.

510

## 511 **Figure legends**

512 **Fig 1. Mechanical overloading through mouse treadmill running increases HMGB1 levels**  
513 **in tendon matrix.** (A) Immunostaining for HMGB1 under various mechanical loading  
514 conditions. (a) Achilles tendon (AT) from cage control mouse shows minimal HMGB1 staining  
515 in tendon matrix. (e) 20x magnification of (a) clearly shows the absence of HMGB1 staining in  
516 the matrix. (b) A representative tendon section from moderate treadmill running (MTR) group



517 showing no positive stain for HMGB1 in the matrix. **(f)** 20x magnification of **(b)** showing  
518 negative stain for HMGB1. **(c)** Tendon matrix shows strong positive stain in the intense treadmill  
519 running (ITR) group indicating that HMGB1 has released to the matrix. **(g)** 20x magnification of  
520 **c** clearly shows positive stain in the matrix. Arrows point to positive staining. **(d)** Similar  
521 HMGB1 positive staining in the matrix of tendon section from one-time treadmill running  
522 (OTR). **(h)** 20x image of **d** (arrowheads point to positive staining). Note that the sections were  
523 not permeabilized with detergent to avoid the staining of HMGB1 in the nuclei. Also, the pink  
524 stains observed in the periphery of **a** and **b** (arrows) are paratenon or adjacent connective tissue.  
525 Data shown are the representatives from two independent experiments (n = 6 mice in each  
526 group). **(B)** ITR significantly increases HMGB1 levels, but OTR and MTR do not significantly  
527 alter HMGB1 levels in patellar tendons (PT) compared to control. **(C)** ITR and OTR  
528 significantly increase HMGB1 levels in Achilles tendons (AT) compared to control. There is no  
529 significant change in MTR group. HMGB1 measurement is normalized to tissue weight. **(D)**  
530 DNA concentrations of tendon samples are equivalent and significantly lower than total lysed  
531 sample. This means that the high HMGB1 concentrations in ITR and OTR are not due to  
532 excessive disruption of cells since HMGB1 releases together with DNA while cells are disrupted  
533 during tissue procession. Data represent mean  $\pm$  SD. n = 6. \* $P < 0.05$ . Bar: 50  $\mu$ m.

534

535 **Fig 2. Inflammatory cells infiltrate to tendon matrix under short term ITR, and implanted**  
536 **HMGB1 induces hypercellularity, inflammatory cell infiltration, and angiogenesis in**  
537 **tendon.** Mouse Achilles tendons (ATs) are stained with CD68 for inflammatory cells like  
538 macrophages and monocytes. **(A)** Mouse AT with cage activity is negative for CD68 stain. **(B)**  
539 Similar to cage control group, MTR group shows no CD68 positive staining. **(C)** AT from short

540 term ITR group shows several positively stained regions for CD68 (red arrows). **(D)** CD68 is  
541 negative in OTR tendon tissue. The brown signals at the edge of the tendon in adjacent soft  
542 tissue are easy to trap antibody that may result in a false negative signal, therefore, signal outside  
543 the tendon proper is not considered. **(E) (a)** H&E stain of control tendon implanted with blank  
544 beads shows no cell proliferation. **(b)** Tendon section with implanted HMGB1 beads shows  
545 extensive cell proliferation (highlighted in the blue box) after implantation for 2 weeks. **(c)** The  
546 implantation site after 4 weeks; higher number of cells (arrowhead) compared to control can be  
547 seen but is much less compared to the 2 weeks group. **(d)** Control with no positive IHC stains for  
548 CD68. **(e)** Positive CD68 staining in HMGB1 implanted sample for 2 weeks shows inflammatory  
549 cell infiltration (arrows). **(f)** 4 weeks implantation group shows minimal positive staining for  
550 CD68. Figures show representative results from at least 3 samples. **(F) (a)** Vessel-like structures  
551 are present in tendon matrix after implantation of HMGB1 beads for 2 weeks (arrows point to  
552 vessels. H&E staining). **(b)** In the same group, extensive angiogenesis (arrow, **b**), as shown by  
553 positive IHC staining for CD31, is detected in the tendon matrix. No similar structure was found  
554 in control group with blank beads or in the 4 weeks implantation group. Bar: 100  $\mu$ m.

555

556 **Fig 3. GL injection blocks short term ITR-induced inflammatory reactions in mouse**  
557 **patellar and Achilles tendon tissues *in vivo*.** **(A)** PGE<sub>2</sub> concentrations significantly increase in  
558 patellar tendon (PT), and Achilles tendon (AT) after short term (3 weeks) ITR, and GL  
559 administration reduces PGE<sub>2</sub> levels in both tendons. **(B)** Similarly, MMP-3 levels significantly  
560 increase in PT and AT in ITR group and GL administration blocks these effects. Data represent  
561 mean  $\pm$  SD. n = 6. \**P* < 0.05.

562

563 **Fig 4. Tendinous tissue near Achilles-bone insertion site shows cell morphology change,**  
564 **GAG deposition, and cartilage marker SOX-9 expression after 12-week Lt- ITR. (A)** Alcian  
565 blue and nuclear fast red staining of tendinous tissue. **(a, b, c)** Tendon from cage control mice  
566 shows regular tendon matrix structure and spindle-shaped cell morphology, and tendon cells are  
567 tightly packed amongst collagen fibers with little space between the cell body **(a-c: 4x, 10x, and**  
568 **20x magnifications)**. There is also minimal staining for GAG in the control group. In ITR  
569 tendon, tendon matrix **(d, e, f)** contains chondrocyte-like “round” cells with cavities called  
570 cartilage lacunae **(f, black arrows)**, with obvious “blank” area between cells and extracellular  
571 matrix **(d-f: 4x, 10x, and 20x magnifications)**. Moreover, extensive “blue” staining of GAG is  
572 shown. **(g)** Semi-quantification of the percentage of round cells with cavities in a 20x field on the  
573 end site of Achilles tendon shows around 30% round cells with cartilage lacunae. **(B)** SOX-9  
574 staining. **(a, b)** Achilles tendons from control group show minimal staining for SOX-9. **(c, d)**  
575 Achilles tendons from ITR group show SOX-9 staining in the tendon (white arrows). **(e)** Semi-  
576 quantification shows about 20% of total cells are SOX-9 positive in the tendon while no cells in  
577 control group express SOX-9. Data represent mean  $\pm$  SD. n = 4. \* $P < 0.05$ . Bar: 50  $\mu$ m.

578

579 **Fig 5. GL attenuates the transformation of tendon cells into chondrocyte-like cells and**  
580 **prevents GAG deposition induced by 24-week Lt-ITR in tendinous tissue near the insertion**  
581 **site of mouse Achilles tendon. (A)** Achilles tendon in **(a)** Cage control (Cont). **(b)** GL injection  
582 only (GL). **(c)** Intensive treadmill running (ITR). **(d)** GL injection+ Intensive treadmill running  
583 (GL+ITR). Also, the yellow boxes in **(a-d)** indicate the proximal region of Achilles tendon,  
584 which is away from the Achilles tendon-bone insertion site, whereas green boxes point to the  
585 area nearby where the Achilles tendon-bone insertion site is located. We focus on the tendinous

586 region indicated by yellow boxes. **(e, f)** Control (Cont) and GL only groups do not show round  
587 cells with cavities, meaning no cartilage cells exist in this tendinous region. **(g)** Tendon at the  
588 proximal region (yellow) in ITR group contains numerous chondrocyte-like cells with cavities  
589 (black arrows). **(h)** GL treatment of ITR group results in the presence of few chondrocyte-like  
590 cells in the proximal region of Achilles tendon, indicating that GL treatment attenuates  
591 chondrocyte-like cell differentiation induced by ITR. **(B)** Alcian Blue staining shows the overall  
592 GAG deposition in the same groups as above. **(e, f)** In Cont and GL injection alone groups,  
593 minimal staining of GAG is present in the proximal region of Achilles tendon (yellow boxes). **(g)**  
594 In ITR group, strong staining of GAG in the proximal region is shown, with chondrocytes-like  
595 cells present in the matrix (black arrows point to cavities around the cells called cartilage  
596 lacunae). Extensive GAG staining is also evident in the distal region **(c, green box)**, which is  
597 expected because this region is considered to be a part of fibrocartilage transitional zone between  
598 Achilles tendon and heel bone. **(h)** In GL treated ITR group, there is minimal staining of GAG in  
599 the proximal region of tendinous tissue. Bar: 25  $\mu$ m.

600

601 **Fig 6. GL treatment reduces the expression of SOX-9 and deposition of collagen II induced**  
602 **by 24-week Lt-ITR in tendinous tissue near the insertion site of mouse Achilles tendon. (A)**  
603 SOX-9 staining in cage control group **(a)**, GL injection alone group **(b)**, ITR group **(c)**, and  
604 GL+ITR group **(d)**. Yellow boxes indicate the proximal region of Achilles tendon- away from  
605 insertion site, whereas green boxes point to the distal region closer to the insertion site. Since the  
606 distal region is part of the fibrocartilage transition zone, our analysis is only focused on the  
607 proximal region of the tendinous tissue. **(e)** Proximal region of the control group shows round  
608 cells without SOX-9 staining. **(f)** No SOX-9 staining is detected in GL group at the proximal

609 region. **(g)** Strong SOX-9 staining, along with the round shaped cells, are shown in ITR group.  
610 **(h)** There is only minimal SOX-9 signal in the same proximal region of Achilles tendon in the  
611 GL+ITR group. **(B)**. Collagen II staining in the same groups as above. Collagen II is mostly  
612 negative in the control and GL groups **(e, f)**, but the staining of collagen II is extensive in the  
613 proximal region of Achilles tendon in the ITR group **(g)**. However, after GL treatment  
614 (GL+ITR), ITR-induced collagen II expression in the proximal region of Achilles tendon is  
615 minimal **(h)**. Bar: 25  $\mu$ m.

616

## 617 **Supporting information**

618 **S1 Fig. HMGB1 is present in mouse tendon and located in the nuclei of tendon cells without**  
619 **mechanical overloading. (A)** A standard Western blot shows the presence of HMGB1 in both  
620 tissues (two samples from different animals) and cells (from two different wells) of patellar  
621 tendon (PT) and Achilles tendon (AT). Total protein was extracted from rat Achilles and patellar  
622 tendons and cells using T-PER buffer. After quantification, 20  $\mu$ g of total protein from each  
623 tendon sample was separated on a 10% SDS-PAGE, transferred onto a nylon membrane and  
624 incubated with rabbit anti-HMGB1 primary antibody (rabbit anti-mouse, 1  $\mu$ g/ml, Cat #  
625 ab18256, Abcam) followed by goat anti-rabbit infrared tag conjugated secondary antibody  
626 (1:5,000 dilution, Cat # C30409-07, LI-COR Biosciences, Lincoln, NE) following the  
627 manufacturer's instructions. Positive signals were detected via the Odyssey CLx infrared  
628 imaging system (LI-COR Biosciences, Lincoln, NE).  $\beta$ -actin served as internal control. **(B)**  
629 Immunostaining of tendon tissue stained for HMGB1 without penetration with detergent shows  
630 that HMGB1 is minimal in tendon matrix. **(C)** HMGB1 staining in the tendon with Triton X-100

631 penetration treatment shows that HMGB1 is located in tendon cell nucleus and cytoplasm. **(D)**  
632 HMGB1 staining of tendon cells in culture. Most cells contain HMGB1 in their nuclei (red). **(E)**  
633 Hoechst H33342 stained nuclei (blue). **(F)** Overlay of both staining **(D, E)**. While HMGB1 is  
634 located in the nuclei of most cells (pink), it is missing in some cells. Bar: 50  $\mu\text{m}$ .

635

636 **S2 Fig. Mechanical overloading of tendon cells *in vitro* induces release of HMGB1 to**  
637 **culture media. (A) (a, d)** Unstretched control cell nuclei stained positive for HMGB1 (pink). **(b,**  
638 **e)** 4% stretched cell nuclei also stained positive for HMGB1. **(c, f)** 8% stretched cells show that  
639 the majority of cells lose HMGB1 in their nuclei, indicating that their cells have released  
640 HMGB1 to culture media under 8% mechanical overloading. Semi-quantification analysis  
641 confirms the results **(g)**. Specifically, without mechanical loading or 4% stretching, more than  
642 95% of tendon cells are stained positive for HMGB1. In contrast, there is only about 35% cells  
643 that are positive staining with HMGB1, which represents 65% reduction in HMGB1 positive  
644 nuclei due to mechanical overloading on the tendon cells. **(B)** The levels of HMGB1 in culture  
645 media were measured using ELISA kits. It is shown that 8% stretch significantly increases  
646 HMGB1 levels compared to control and 4% stretch. The cell stretching experiments were done  
647 according to our published protocol (15, 61). All data are means  $\pm$  SD.  $n = 6$ .  $*P < 0.05$ . Bar: 50  
648  $\mu\text{m}$ .

649

650 **S3 Fig. IP injection results in the presence of GL in tendon.** Three hours after IP injection,  
651 significant amounts of GL, quantified using thin layer chromatography (62), are detected in  
652 mouse tendons. Amount of GL is minimal in mouse tendons without IP injection of GL, but

653 there is 13-fold increase of GL in PT and 6.8-fold increase in AT. PT – patellar tendon, and AT –  
654 Achilles tendon. n = 4. \**P* < 0.05.

655

656 **S4 Fig. GL blocks PGE<sub>2</sub> and MMP-3 production induced by HMGB1 in tendon cells. (A)**

657 Tendon cells derived from rat Achilles tendons were treated with 10 µg/ml HMGB1 or 10 µg/ml  
658 HMGB1+ 200 µM GL in culture, 10 ng/ml IL-1β served as a positive control. PGE<sub>2</sub> levels  
659 determined by ELISA, significantly increase at 10 µg/ml HMGB1 treatment at 0.5, 2, and 4 hrs,  
660 and combined treatment with GL (200 µM) mitigates the effects of HMGB1. **(B)** HMGB1  
661 treatment (10 µg/ml) of tendon cells significantly increase the production of MMP-3 (ELISA  
662 quantification) by tendon cells in culture medium, but addition of 200 µM GL with HMGB1  
663 reduces MMP-3 to a similar level as the non-treated control. Data represent mean ± SD. n = 4.  
664 \**P* < 0.05.

665

666 **S5 Fig. HMGB1 is present near the insertion site of Achilles tendon after 24 weeks ITR. (A,**

667 **B)** In the proximal region of tendinous tissue near the mouse Achilles tendon-bone insertion site,  
668 HMGB1 staining is minimal in control and GL only groups. **(C)** HMGB1 is present in tendon  
669 matrix in the treadmill running group (arrows). **(D)** HMGB1 is also detected in the tendon matrix  
670 of GL+ITR group (arrows). **(E, F)** CD68 staining is negative in cage control and GL injection  
671 only group (yellow arrows). **(G)** CD68 is positive in ITR group (arrows) and gathered in a  
672 clustered form. **(H)** No positive CD68 signal in the GL-treated ITR tendon tissue. Bar: 50 µm.

673

674

## 675 **References**

- 676 1. Riley G. Chronic tendon pathology: molecular basis and therapeutic implications. *Expert*  
677 *reviews in molecular medicine*. 2005;7(5):1-25.
- 678 2. Kaux JF, Forthomme B, Goff CL, Crielaard JM, Croisier JL. Current opinions on  
679 tendinopathy. *J Sports Sci Med*. 2011;10(2):238-53.
- 680 3. Lipman K, Wang C, Ting K, Soo C, Zheng Z. Tendinopathy: injury, repair, and current  
681 exploration. *Drug Des Devel Ther*. 2018;12:591-603.
- 682 4. Irwin TA. Current concepts review: insertional achilles tendinopathy. *Foot & ankle*  
683 *international*. 2010;31(10):933-9.
- 684 5. Khan KM, Cook JL, Bonar F, Harcourt P, Astrom M. Histopathology of common  
685 tendinopathies. Update and implications for clinical management. *Sports Med*. 1999;27(6):393-  
686 408.
- 687 6. Magnusson SP, Langberg H, Kjaer M. The pathogenesis of tendinopathy: balancing the  
688 response to loading. *Nature reviews Rheumatology*. 2010;6(5):262-8.
- 689 7. Scott A, Backman LJ, Speed C. Tendinopathy: Update on Pathophysiology. *J Orthop*  
690 *Sports Phys Ther*. 2015;45(11):833-41.
- 691 8. Spiesz EM, Thorpe CT, Chaudhry S, Riley GP, Birch HL, Clegg PD, et al. Tendon  
692 extracellular matrix damage, degradation and inflammation in response to in vitro overload  
693 exercise. *Journal of orthopaedic research : official publication of the Orthopaedic Research*  
694 *Society*. 2015;33(6):889-97.
- 695 9. Thorpe CT, Chaudhry S, Lei, II, Varone A, Riley GP, Birch HL, et al. Tendon overload  
696 results in alterations in cell shape and increased markers of inflammation and matrix degradation.  
697 *Scandinavian journal of medicine & science in sports*. 2015;25(4):e381-91.
- 698 10. Lavagnino M, Wall ME, Little D, Banes AJ, Guilak F, Arnoczky SP. Tendon  
699 mechanobiology: Current knowledge and future research opportunities. *Journal of orthopaedic*  
700 *research : official publication of the Orthopaedic Research Society*. 2015;33(6):813-22.
- 701 11. Millar NL, Hueber AJ, Reilly JH, Xu Y, Fazzi UG, Murrell GA, et al. Inflammation is  
702 present in early human tendinopathy. *The American journal of sports medicine*.  
703 2010;38(10):2085-91.
- 704 12. Dakin SG, Martinez FO, Yapp C, Wells G, Oppermann U, Dean BJ, et al. Inflammation  
705 activation and resolution in human tendon disease. *Sci Transl Med*. 2015;7(311):311ra173.
- 706 13. Dakin SG, Newton J, Martinez FO, Hedley R, Gwilym S, Jones N, et al. Chronic  
707 inflammation is a feature of Achilles tendinopathy and rupture. *British journal of sports*  
708 *medicine*. 2018;52(6):359-67.
- 709 14. Riley G. The pathogenesis of tendinopathy. A molecular perspective. *Rheumatology*  
710 *(Oxford)*. 2004;43(2):131-42.
- 711 15. Wang JH, Jia F, Yang G, Yang S, Campbell BH, Stone D, et al. Cyclic mechanical  
712 stretching of human tendon fibroblasts increases the production of prostaglandin E2 and levels of  
713 cyclooxygenase expression: a novel in vitro model study. *Connect Tissue Res*. 2003;44(3-  
714 4):128-33.
- 715 16. Li Z, Yang G, Khan M, Stone D, Woo SL, Wang JH. Inflammatory response of human  
716 tendon fibroblasts to cyclic mechanical stretching. *The American journal of sports medicine*.  
717 2004;32(2):435-40.



- 718 17. Zhang JY, Wang JHC. Production of PGE(2) Increases in Tendons Subjected to  
719 Repetitive Mechanical Loading and Induces Differentiation of Tendon Stem Cells into Non-  
720 Tenocytes. *Journal of Orthopaedic Research*. 2010;28(2):198-203.
- 721 18. Khan MH, Li ZZ, Wang JHC. Repeated exposure of tendon to prostaglandin-E2 leads to  
722 localized tendon degeneration. *J Sports Med*. 2005;15(1):27-33.
- 723 19. Jarvinen TA, Kannus P, Maffulli N, Khan KM. Achilles tendon disorders: etiology and  
724 epidemiology. *Foot and ankle clinics*. 2005;10(2):255-66.
- 725 20. Glazebrook MA, Wright JR, Jr., Langman M, Stanish WD, Lee JM. Histological analysis  
726 of achilles tendons in an overuse rat model. *Journal of orthopaedic research : official publication*  
727 *of the Orthopaedic Research Society*. 2008;26(6):840-6.
- 728 21. Riley GP, Curry V, DeGroot J, van El B, Verzijl N, Hazleman BL, et al. Matrix  
729 metalloproteinase activities and their relationship with collagen remodelling in tendon pathology.  
730 *Matrix biology : journal of the International Society for Matrix Biology*. 2002;21(2):185-95.
- 731 22. Wang H, Bloom O, Zhang M, Vishnubhakat JM, Ombrellino M, Che J, et al. HMG-1 as a  
732 late mediator of endotoxin lethality in mice. *Science*. 1999;285(5425):248-51.
- 733 23. Klune JR, Dhupar R, Cardinal J, Billiar TR, Tsung A. HMGB1: endogenous danger  
734 signaling. *Mol Med*. 2008;14(7-8):476-84.
- 735 24. Tang D, Kang R, Zeh HJ, 3rd, Lotze MT. High-mobility group box 1, oxidative stress,  
736 and disease. *Antioxid Redox Signal*. 2011;14(7):1315-35.
- 737 25. Wolf M, Lossdorfer S, Kupper K, Jager A. Regulation of high mobility group box protein  
738 1 expression following mechanical loading by orthodontic forces in vitro and in vivo. *European*  
739 *journal of orthodontics*. 2013.
- 740 26. Lv S, Li J, Feng W, Liu H, Du J, Sun J, et al. Expression of HMGB1 in the periodontal  
741 tissue subjected to orthodontic force application by Waldo's method in mice. *J Mol Histol*.  
742 2015;46(1):107-14.
- 743 27. Scaffidi P, Misteli T, Bianchi ME. Release of chromatin protein HMGB1 by necrotic  
744 cells triggers inflammation. *Nature*. 2002;418(6894):191-5.
- 745 28. Venereau E, Casalgrandi M, Schiraldi M, Antoine DJ, Cattaneo A, De Marchis F, et al.  
746 Mutually exclusive redox forms of HMGB1 promote cell recruitment or proinflammatory  
747 cytokine release. *J Exp Med*. 2012;209(9):1519-28.
- 748 29. Venereau E, Schiraldi M, Uguccioni M, Bianchi ME. HMGB1 and leukocyte migration  
749 during trauma and sterile inflammation. *Mol Immunol*. 2013;55(1):76-82.
- 750 30. Tsung A, Tohme S, Billiar TR. High-mobility group box-1 in sterile inflammation.  
751 *Journal of internal medicine*. 2014;276(5):425-43.
- 752 31. Kang R, Chen R, Zhang Q, Hou W, Wu S, Cao L, et al. HMGB1 in health and disease.  
753 *Mol Aspects Med*. 2014;40:1-116.
- 754 32. Yang H, Wang H, Chavan SS, Andersson U. High Mobility Group Box Protein 1  
755 (HMGB1): The Prototypical Endogenous Danger Molecule. *Mol Med*. 2015;21 Suppl 1:S6-S12.
- 756 33. Erlandsson Harris H, Andersson U. Mini-review: The nuclear protein HMGB1 as a  
757 proinflammatory mediator. *European Journal of Immunology*. 2004;34(6):1503-12.
- 758 34. Andersson U, Tracey KJ. HMGB1 is a therapeutic target for sterile inflammation and  
759 infection. *Annual review of immunology*. 2011;29:139-62.
- 760 35. Wahamaa H, Schierbeck H, Hreggvidsdottir HS, Palmblad K, Aveberger AC, Andersson  
761 U, et al. High mobility group box protein 1 in complex with lipopolysaccharide or IL-1 promotes  
762 an increased inflammatory phenotype in synovial fibroblasts. *Arthritis research & therapy*.  
763 2011;13(4):R136.

- 764 36. Millar NL, Murrell GA, McInnes IB. Alarmins in tendinopathy: unravelling new  
765 mechanisms in a common disease. *Rheumatology (Oxford)*. 2013;52(5):769-79.
- 766 37. Akbar M, Gilchrist DS, Kitson SM, Nelis B, Crowe LAN, Garcia-Melchor E, et al.  
767 Targeting danger molecules in tendinopathy: the HMGB1/TLR4 axis. *RMD Open*.  
768 2017;3(2):e000456.
- 769 38. Mosca MJ, Carr AJ, Snelling SJB, Wheway K, Watkins B, Dakin SG. Differential  
770 expression of alarmins-S100A9, IL-33, HMGB1 and HIF-1alpha in supraspinatus tendinopathy  
771 before and after treatment. *BMJ open sport & exercise medicine*. 2017;3(1):e000225.
- 772 39. Thankam FG, Roesch ZK, Dilisio MF, Radwan MM, Kovilam A, Gross RM, et al.  
773 Association of Inflammatory Responses and ECM Disorganization with HMGB1 Upregulation  
774 and NLRP3 Inflammasome Activation in the Injured Rotator Cuff Tendon. *Sci Rep*.  
775 2018;8(1):8918.
- 776 40. Li XL, Zhou AG, Zhang L, Chen WJ. Antioxidant status and immune activity of  
777 glycyrrhizin in allergic rhinitis mice. *International journal of molecular sciences*.  
778 2011;12(2):905-16.
- 779 41. Gwak GY, Moon TG, Lee DH, Yoo BC. Glycyrrhizin attenuates HMGB1-induced  
780 hepatocyte apoptosis by inhibiting the p38-dependent mitochondrial pathway. *World journal of*  
781 *gastroenterology*. 2012;18(7):679-84.
- 782 42. Yang PS, Kim DH, Lee YJ, Lee SE, Kang WJ, Chang HJ, et al. Glycyrrhizin, inhibitor of  
783 high mobility group box-1, attenuates monocrotaline-induced pulmonary hypertension and  
784 vascular remodeling in rats. *Respir Res*. 2014;15:148.
- 785 43. Yuan T, Zhang J, Zhao G, Zhou Y, Zhang C-Q, Wang JHC. Creating an Animal Model  
786 of Tendinopathy by Inducing Chondrogenic Differentiation with Kartogenin. *PloS one*.  
787 2016;11(2):e0148557.
- 788 44. Xu Y, Murrell GA. The basic science of tendinopathy. *Clinical orthopaedics and related*  
789 *research*. 2008;466(7):1528-38.
- 790 45. Abate M, Silbernagel KG, Siljeholm C, Di Iorio A, De Amicis D, Salini V, et al.  
791 Pathogenesis of tendinopathies: inflammation or degeneration? *Arthritis research & therapy*.  
792 2009;11(3):235.
- 793 46. Battery L, Maffulli N. Inflammation in overuse tendon injuries. *Sports medicine and*  
794 *arthroscopy review*. 2011;19(3):213-7.
- 795 47. Thankam FG, Dilisio MF, Dietz NE, Agrawal DK. TREM-1, HMGB1 and RAGE in the  
796 Shoulder Tendon: Dual Mechanisms for Inflammation Based on the Coincidence of  
797 Glenohumeral Arthritis. *PloS one*. 2016;11(10):e0165492.
- 798 48. Andersson U, Harris HE. The role of HMGB1 in the pathogenesis of rheumatic disease.  
799 *Biochim Biophys Acta*. 2010;1799(1-2):141-8.
- 800 49. Sawa H, Ueda T, Takeyama Y, Yasuda T, Shinzeki M, Nakajima T, et al. Blockade of  
801 high mobility group box-1 protein attenuates experimental severe acute pancreatitis. *World*  
802 *journal of gastroenterology*. 2006;12(47):7666-70.
- 803 50. Kokkola R, Li J, Sundberg E, Aveberger AC, Palmblad K, Yang H, et al. Successful  
804 treatment of collagen-induced arthritis in mice and rats by targeting extracellular high mobility  
805 group box chromosomal protein 1 activity. *Arthritis and rheumatism*. 2003;48(7):2052-8.
- 806 51. Leclerc P, Wähämaa H, Idborg H, Jakobsson PJ, Harris HE, Korotkova M. IL-  
807 1 $\beta$ /HMGB1 Complexes Promote The PGE(2) Biosynthesis Pathway in Synovial Fibroblasts.  
808 *Scandinavian Journal of Immunology*. 2013;77(5):350-60.

- 809 52. Mollica L, De Marchis F, Spitaleri A, Dallacosta C, Pennacchini D, Zamai M, et al.  
810 Glycyrrhizin binds to high-mobility group box 1 protein and inhibits its cytokine activities.  
811 Chem Biol. 2007;14(4):431-41.
- 812 53. Akamatsu H, Komura J, Asada Y, Niwa Y. Mechanism of anti-inflammatory action of  
813 glycyrrhizin: effect on neutrophil functions including reactive oxygen species generation. *Planta*  
814 *Med.* 1991;57(2):119-21.
- 815 54. Genovese T, Menegazzi M, Mazzon E, Crisafulli C, Di Paola R, Dal Bosco M, et al.  
816 Glycyrrhizin reduces secondary inflammatory process after spinal cord compression injury in  
817 mice. *Shock.* 2009;31(4):367-75.
- 818 55. Fu Y, Zhou E, Wei Z, Liang D, Wang W, Wang T, et al. Glycyrrhizin inhibits the  
819 inflammatory response in mouse mammary epithelial cells and a mouse mastitis model. *Febs j.*  
820 2014;281(11):2543-57.
- 821 56. Kim YM, Kim HJ, Chang KC. Glycyrrhizin reduces HMGB1 secretion in  
822 lipopolysaccharide-activated RAW 264.7 cells and endotoxemic mice by p38/Nrf2-dependent  
823 induction of HO-1. *Int Immunopharmacol.* 2015;26(1):112-8.
- 824 57. van Rossum TG, Vulto AG, de Man RA, Brouwer JT, Schalm SW. Review article:  
825 glycyrrhizin as a potential treatment for chronic hepatitis C. *Aliment Pharmacol Ther.*  
826 1998;12(3):199-205.
- 827 58. Liu HR, Feng W, Yimin, Cui J, Lv SY, Hasegawa T, et al. Histological Evidence of  
828 Increased Osteoclast Cell Number and Asymmetric Bone Resorption Activity in the Tibiae of  
829 Interleukin-6-Deficient Mice. *J Histochem Cytochem.* 2014;62(8):556-64.
- 830 59. Armanini D, Calo L, Semplicini A. Pseudohyperaldosteronism: pathogenetic  
831 mechanisms. *Crit Rev Clin Lab Sci.* 2003;40(3):295-335.
- 832 60. Zhang J, Wang JH. BMP-2 mediates PGE(2) -induced reduction of proliferation and  
833 osteogenic differentiation of human tendon stem cells. *Journal of orthopaedic research : official*  
834 *publication of the Orthopaedic Research Society.* 2012;30(1):47-52.
- 835 61. Zhang J, Wang JH. The effects of mechanical loading on tendons--an in vivo and in vitro  
836 model study. *PloS one.* 2013;8(8):e71740.
- 837 62. Shah SL, Wahid F, Khan N, Farooq U, Shah AJ, Tareen S, et al. Inhibitory Effects of  
838 *Glycyrrhiza glabra* and Its Major Constituent Glycyrrhizin on Inflammation-Associated Corneal  
839 Neovascularization. *Evid Based Complement Alternat Med.* 2018;2018:8438101.
- 840

**A****Cont****MTR****ITR****OTR****10x**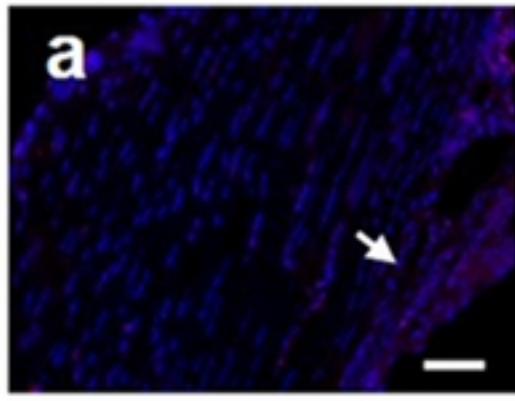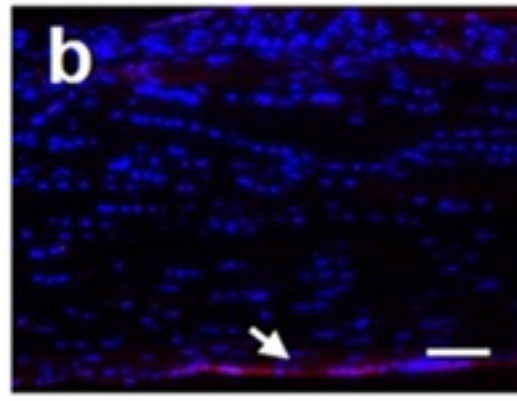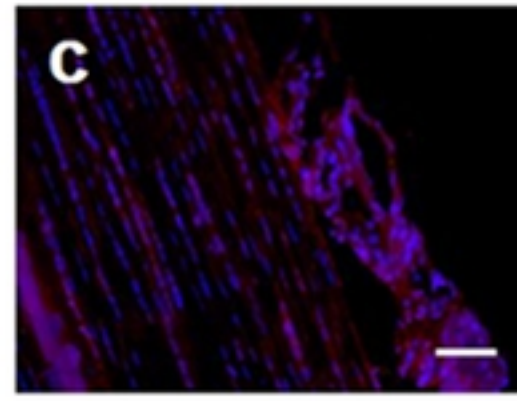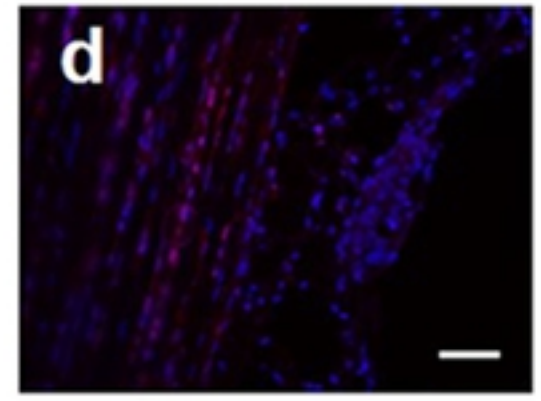**20x**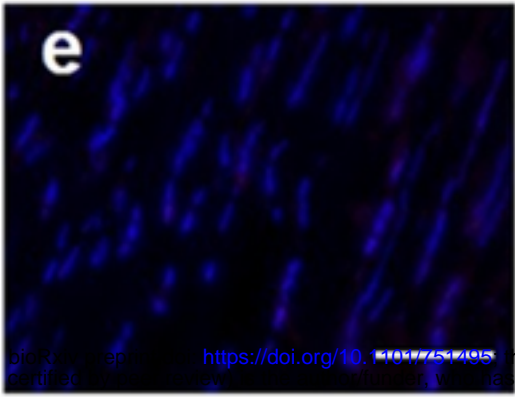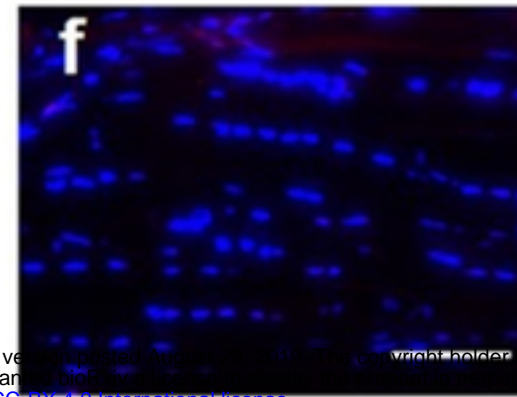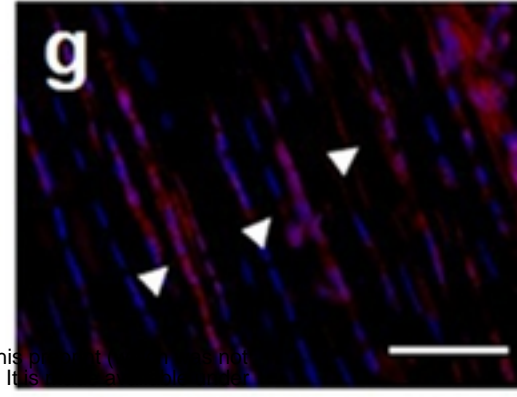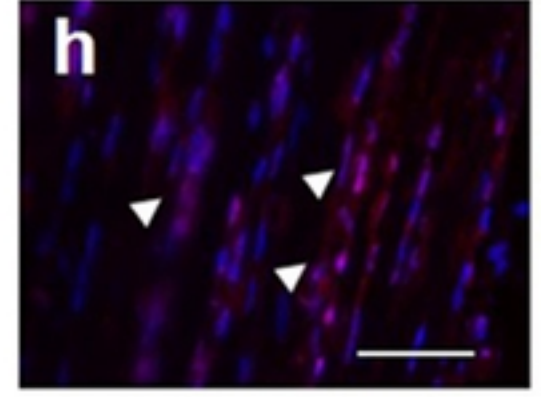**B**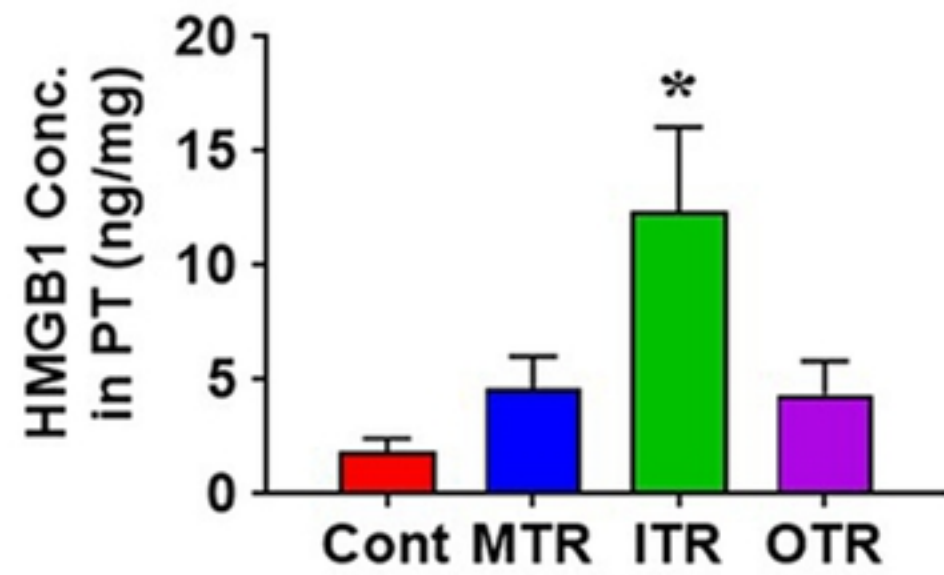**C**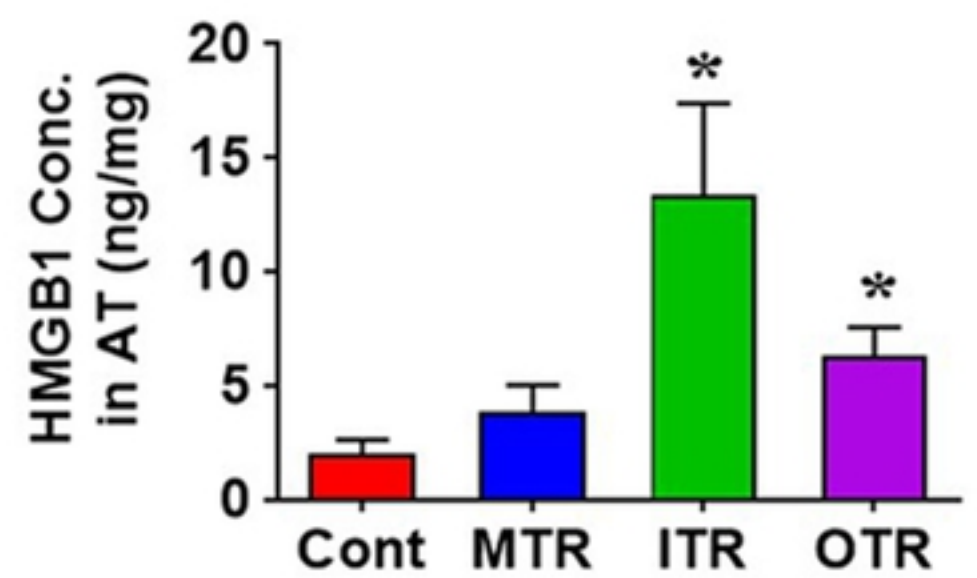**D**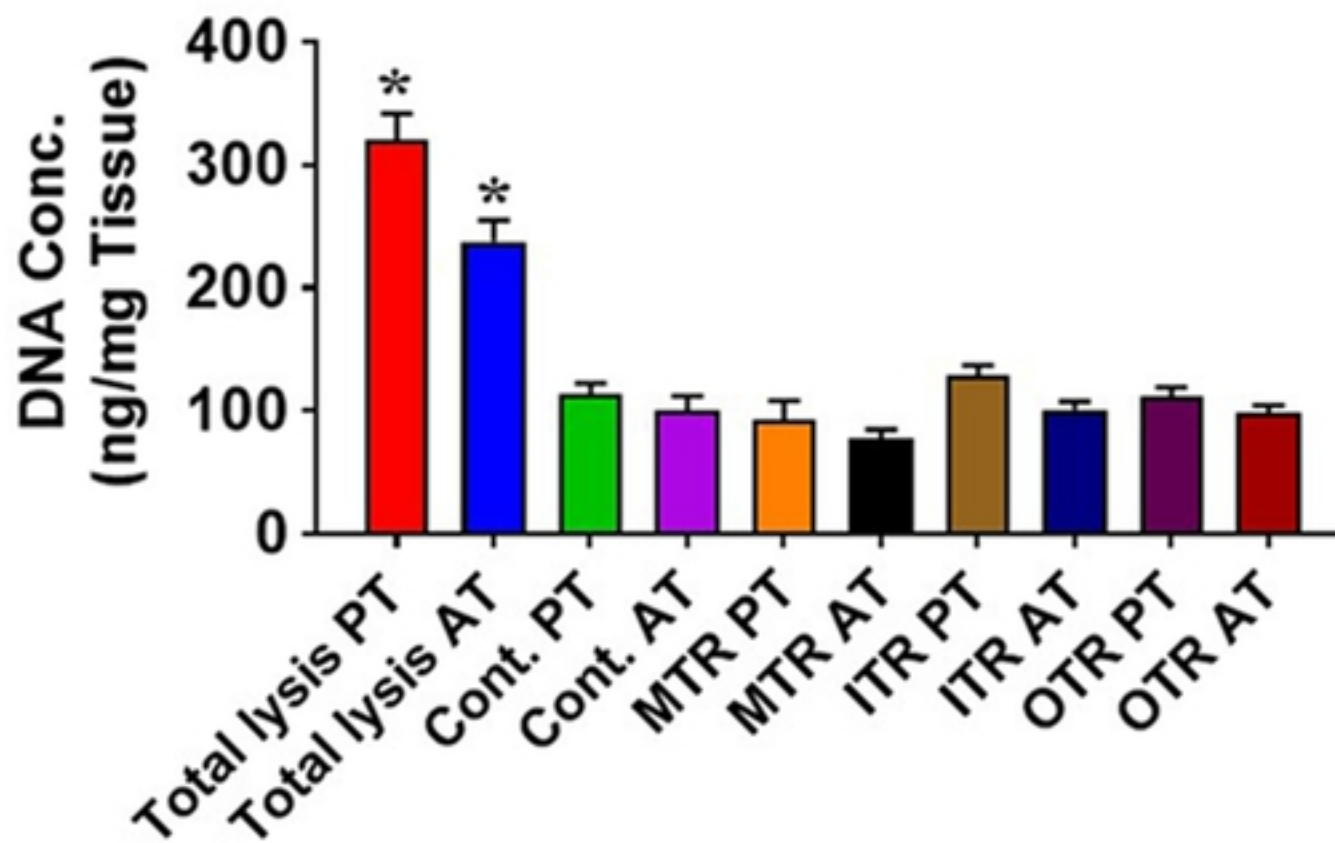

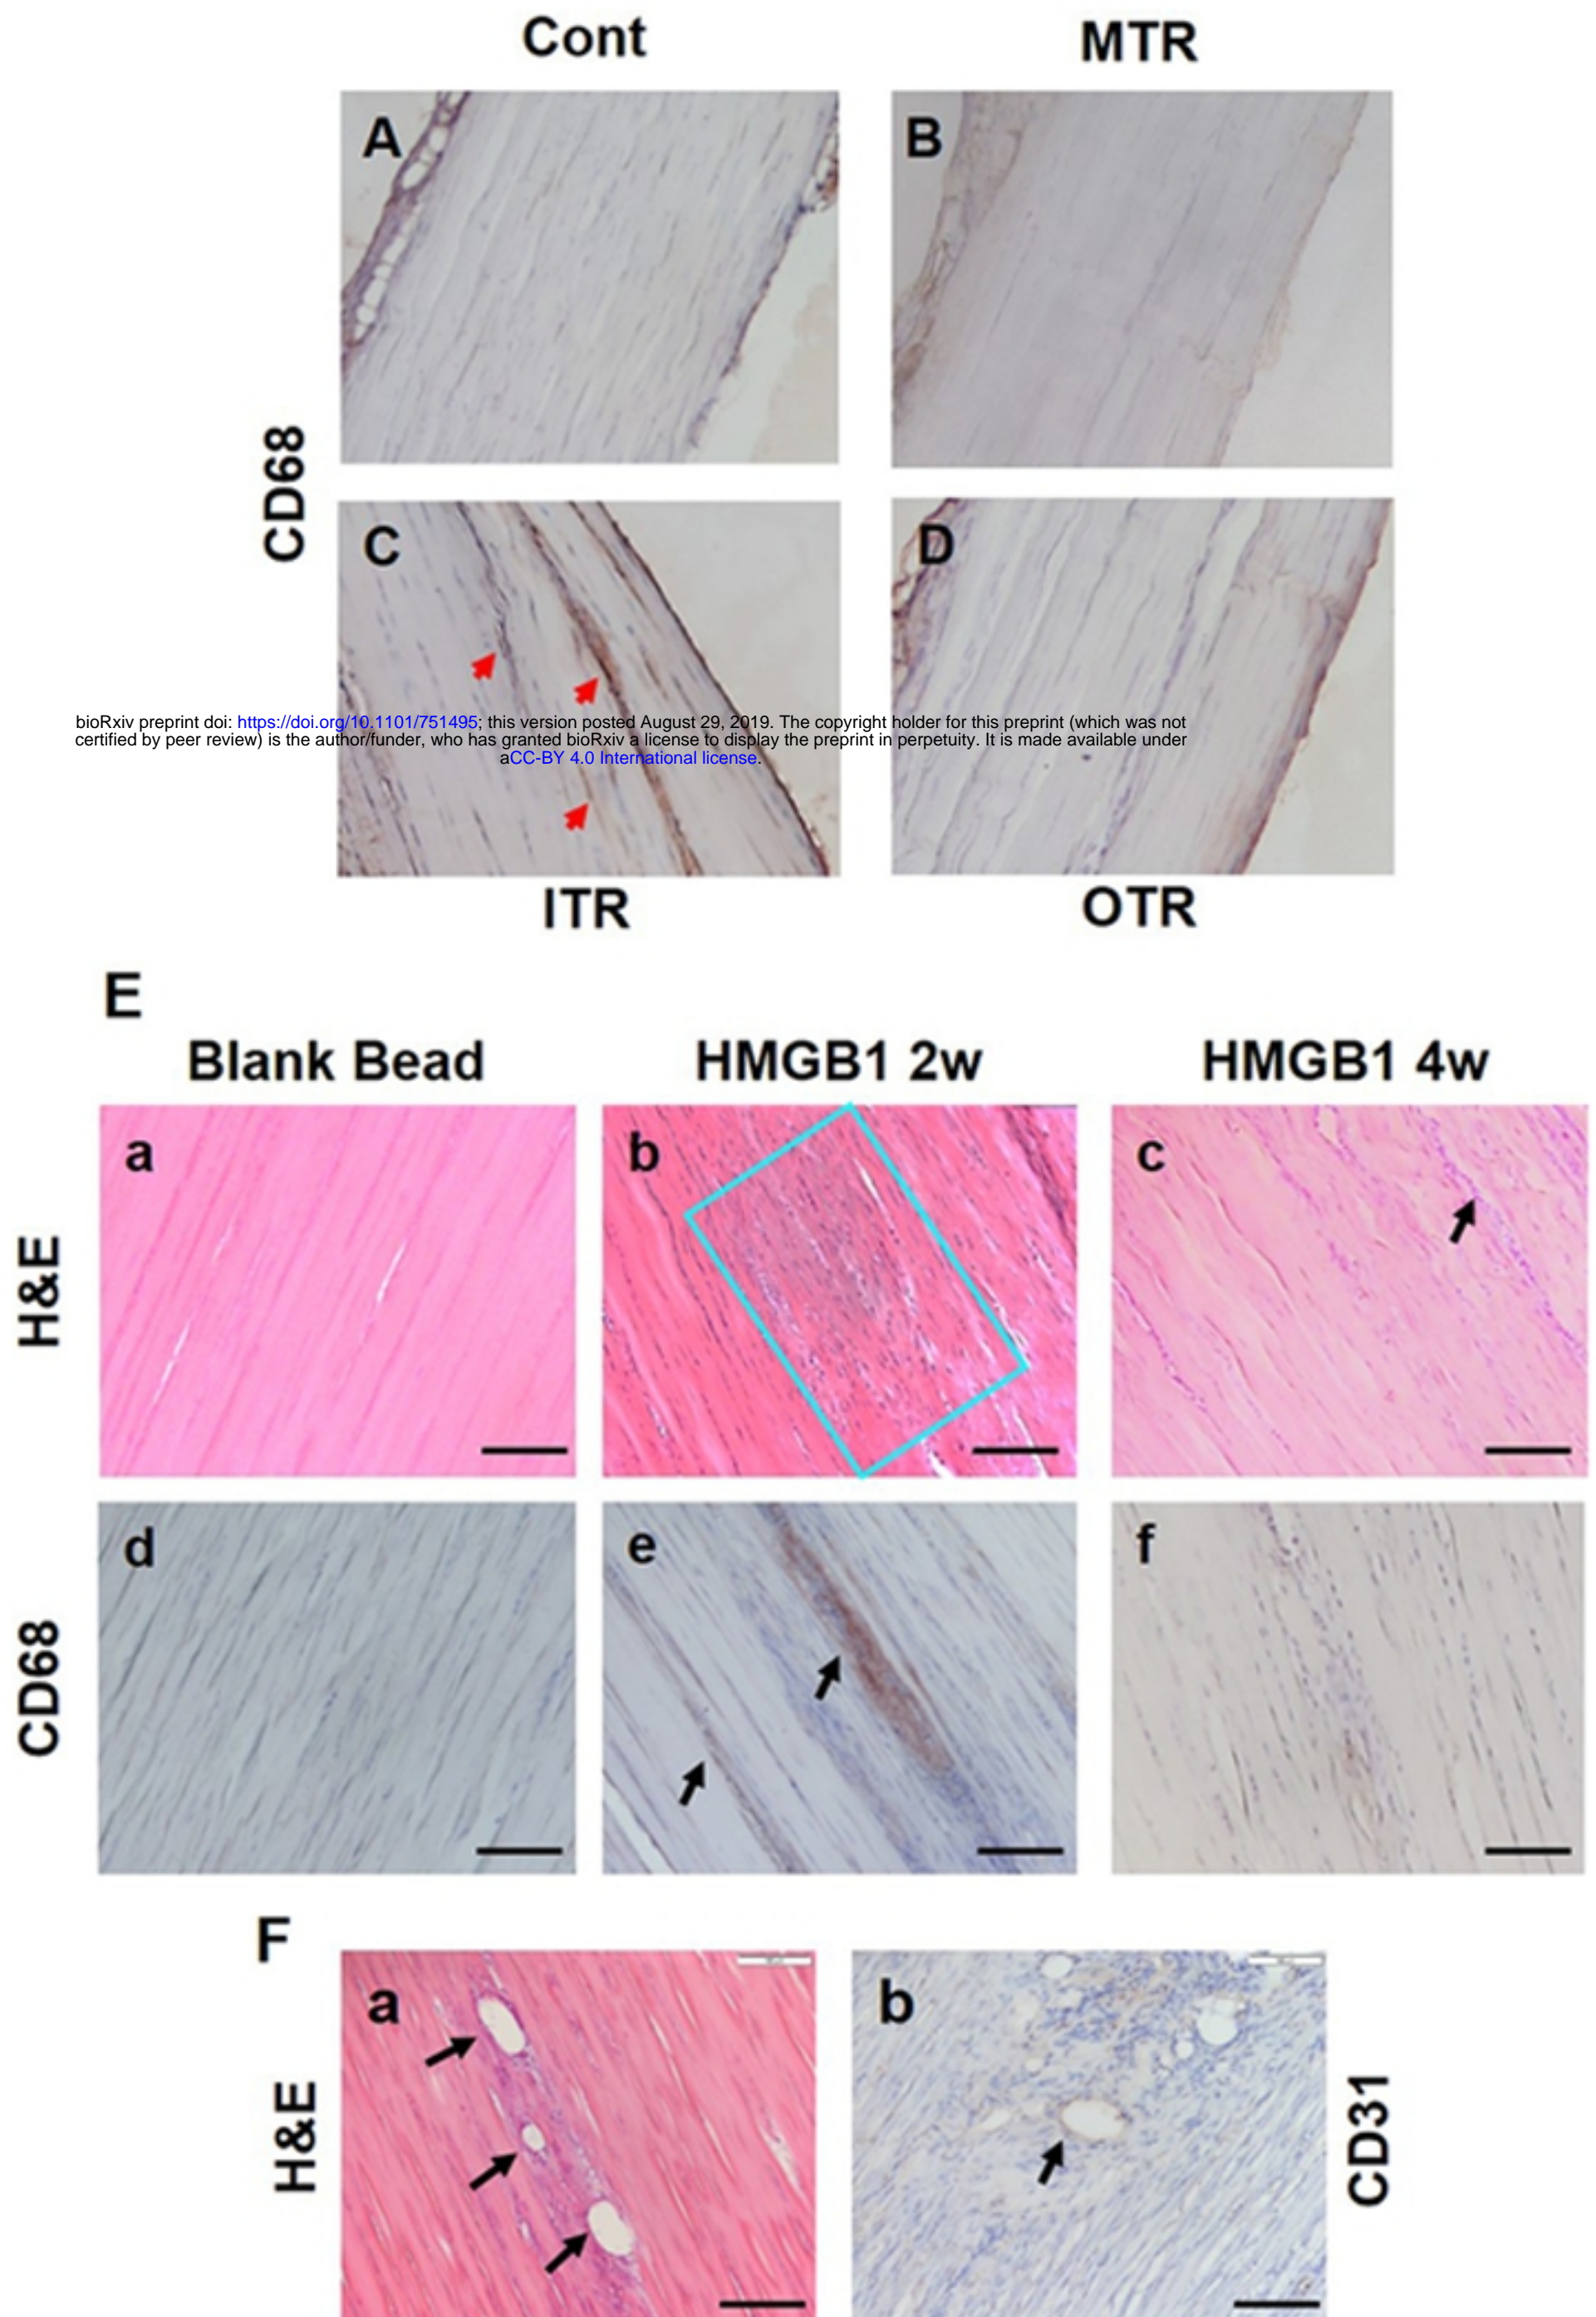

Figure

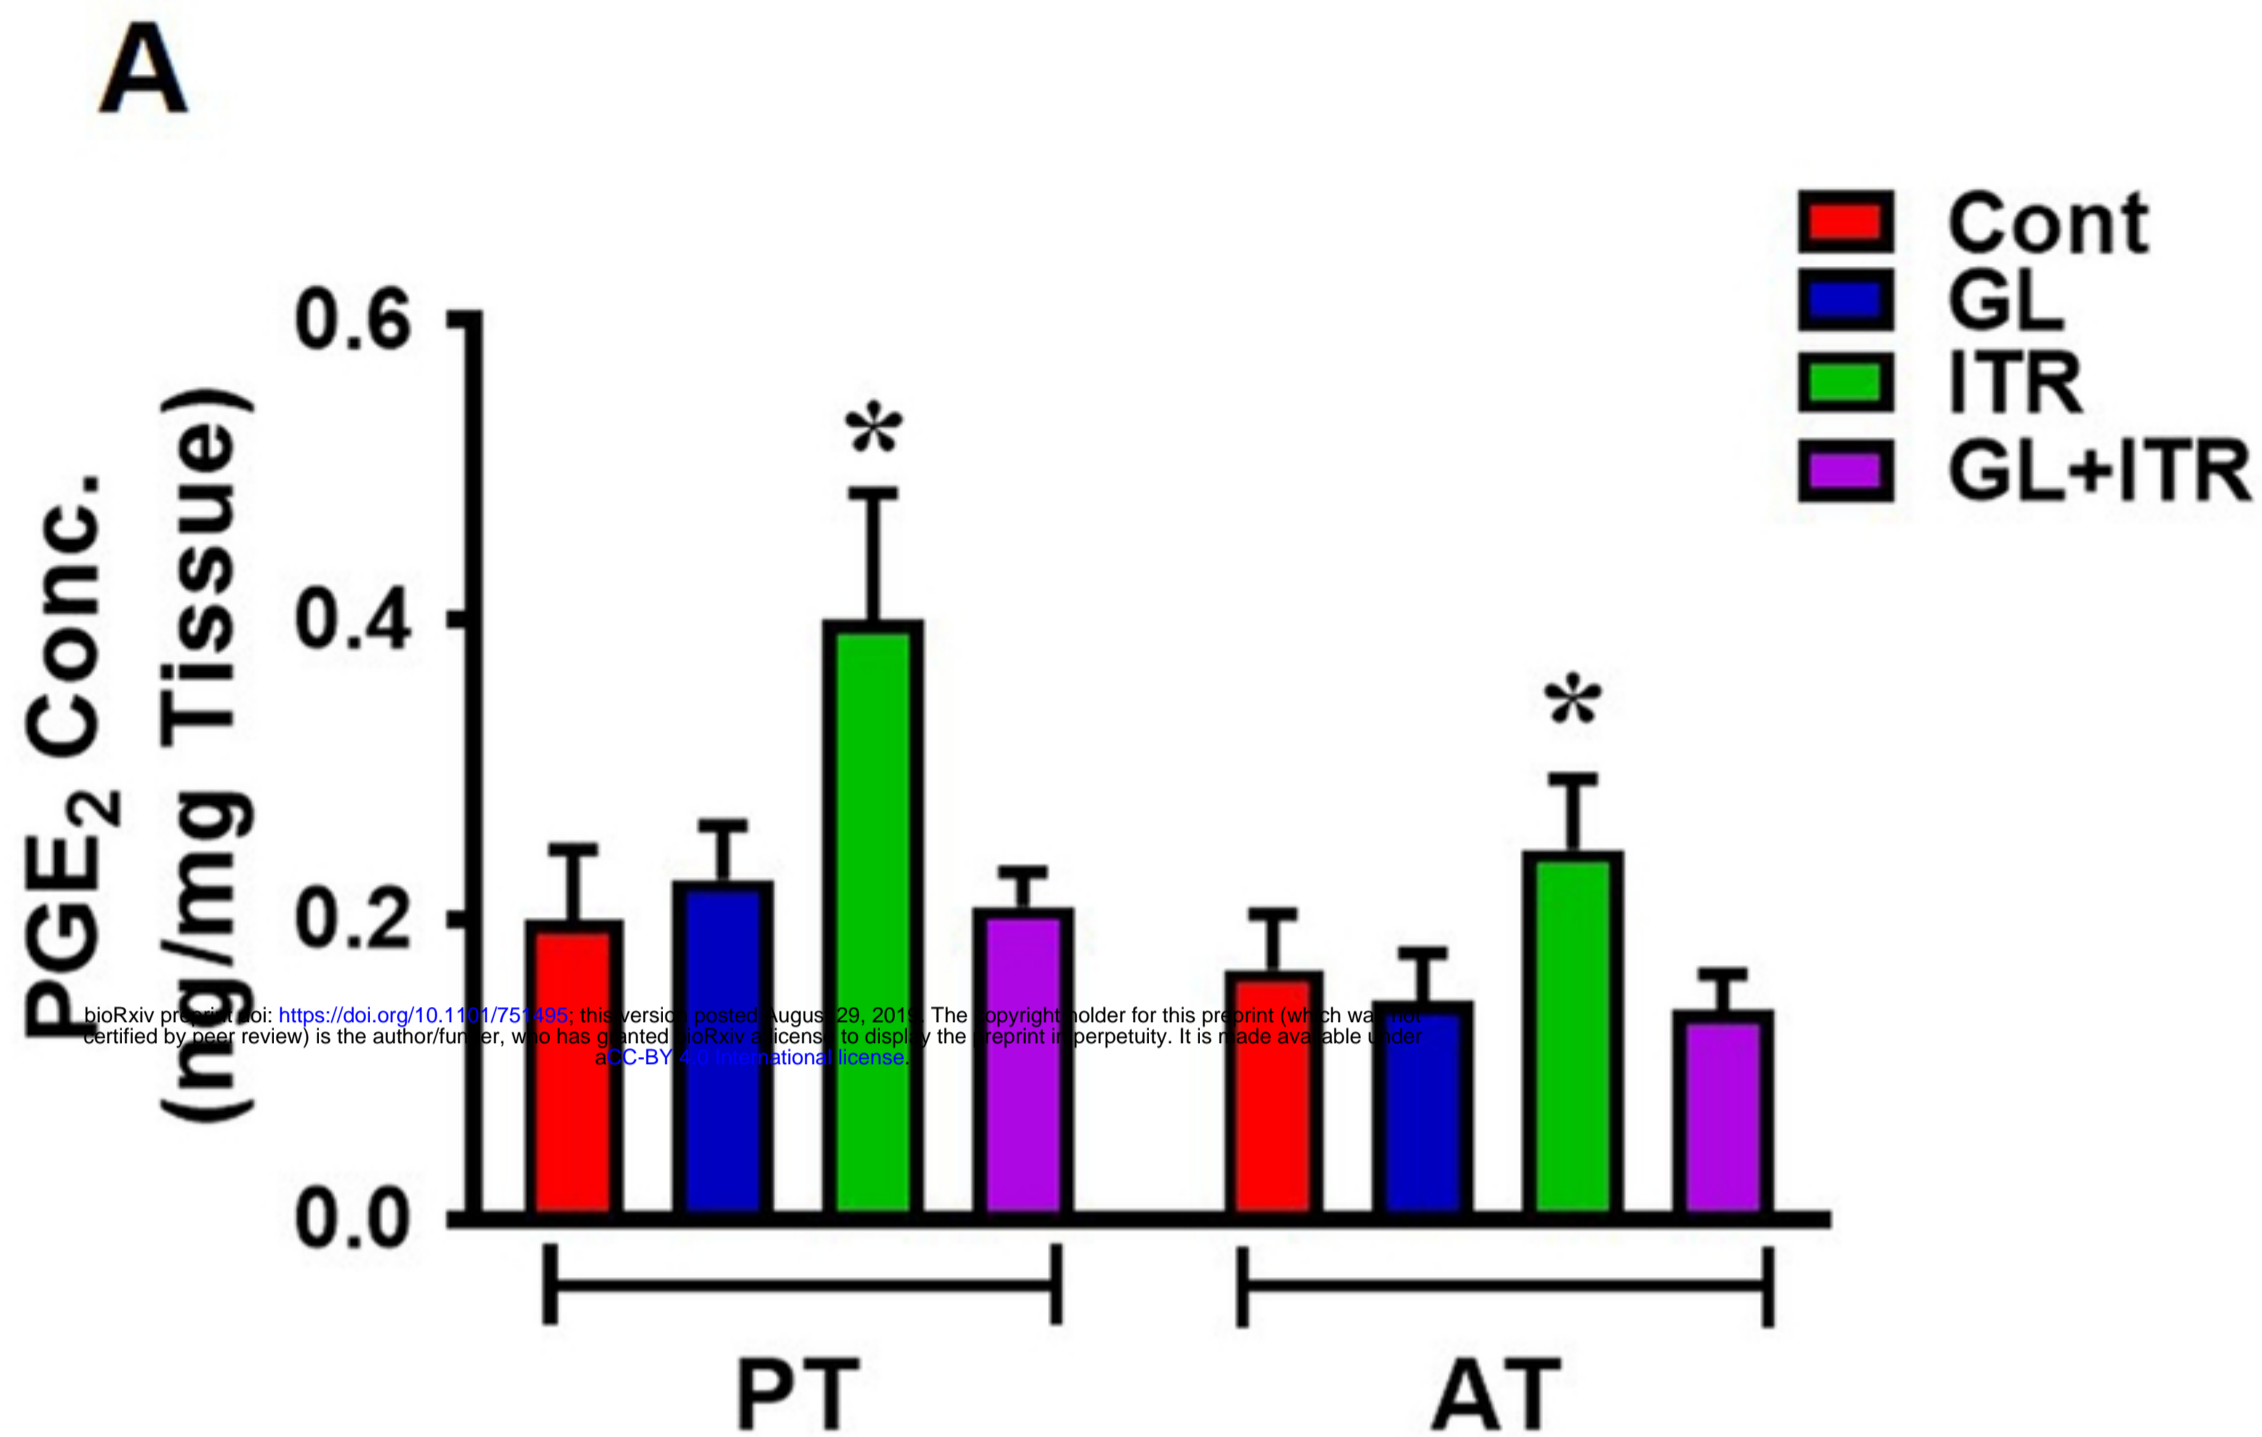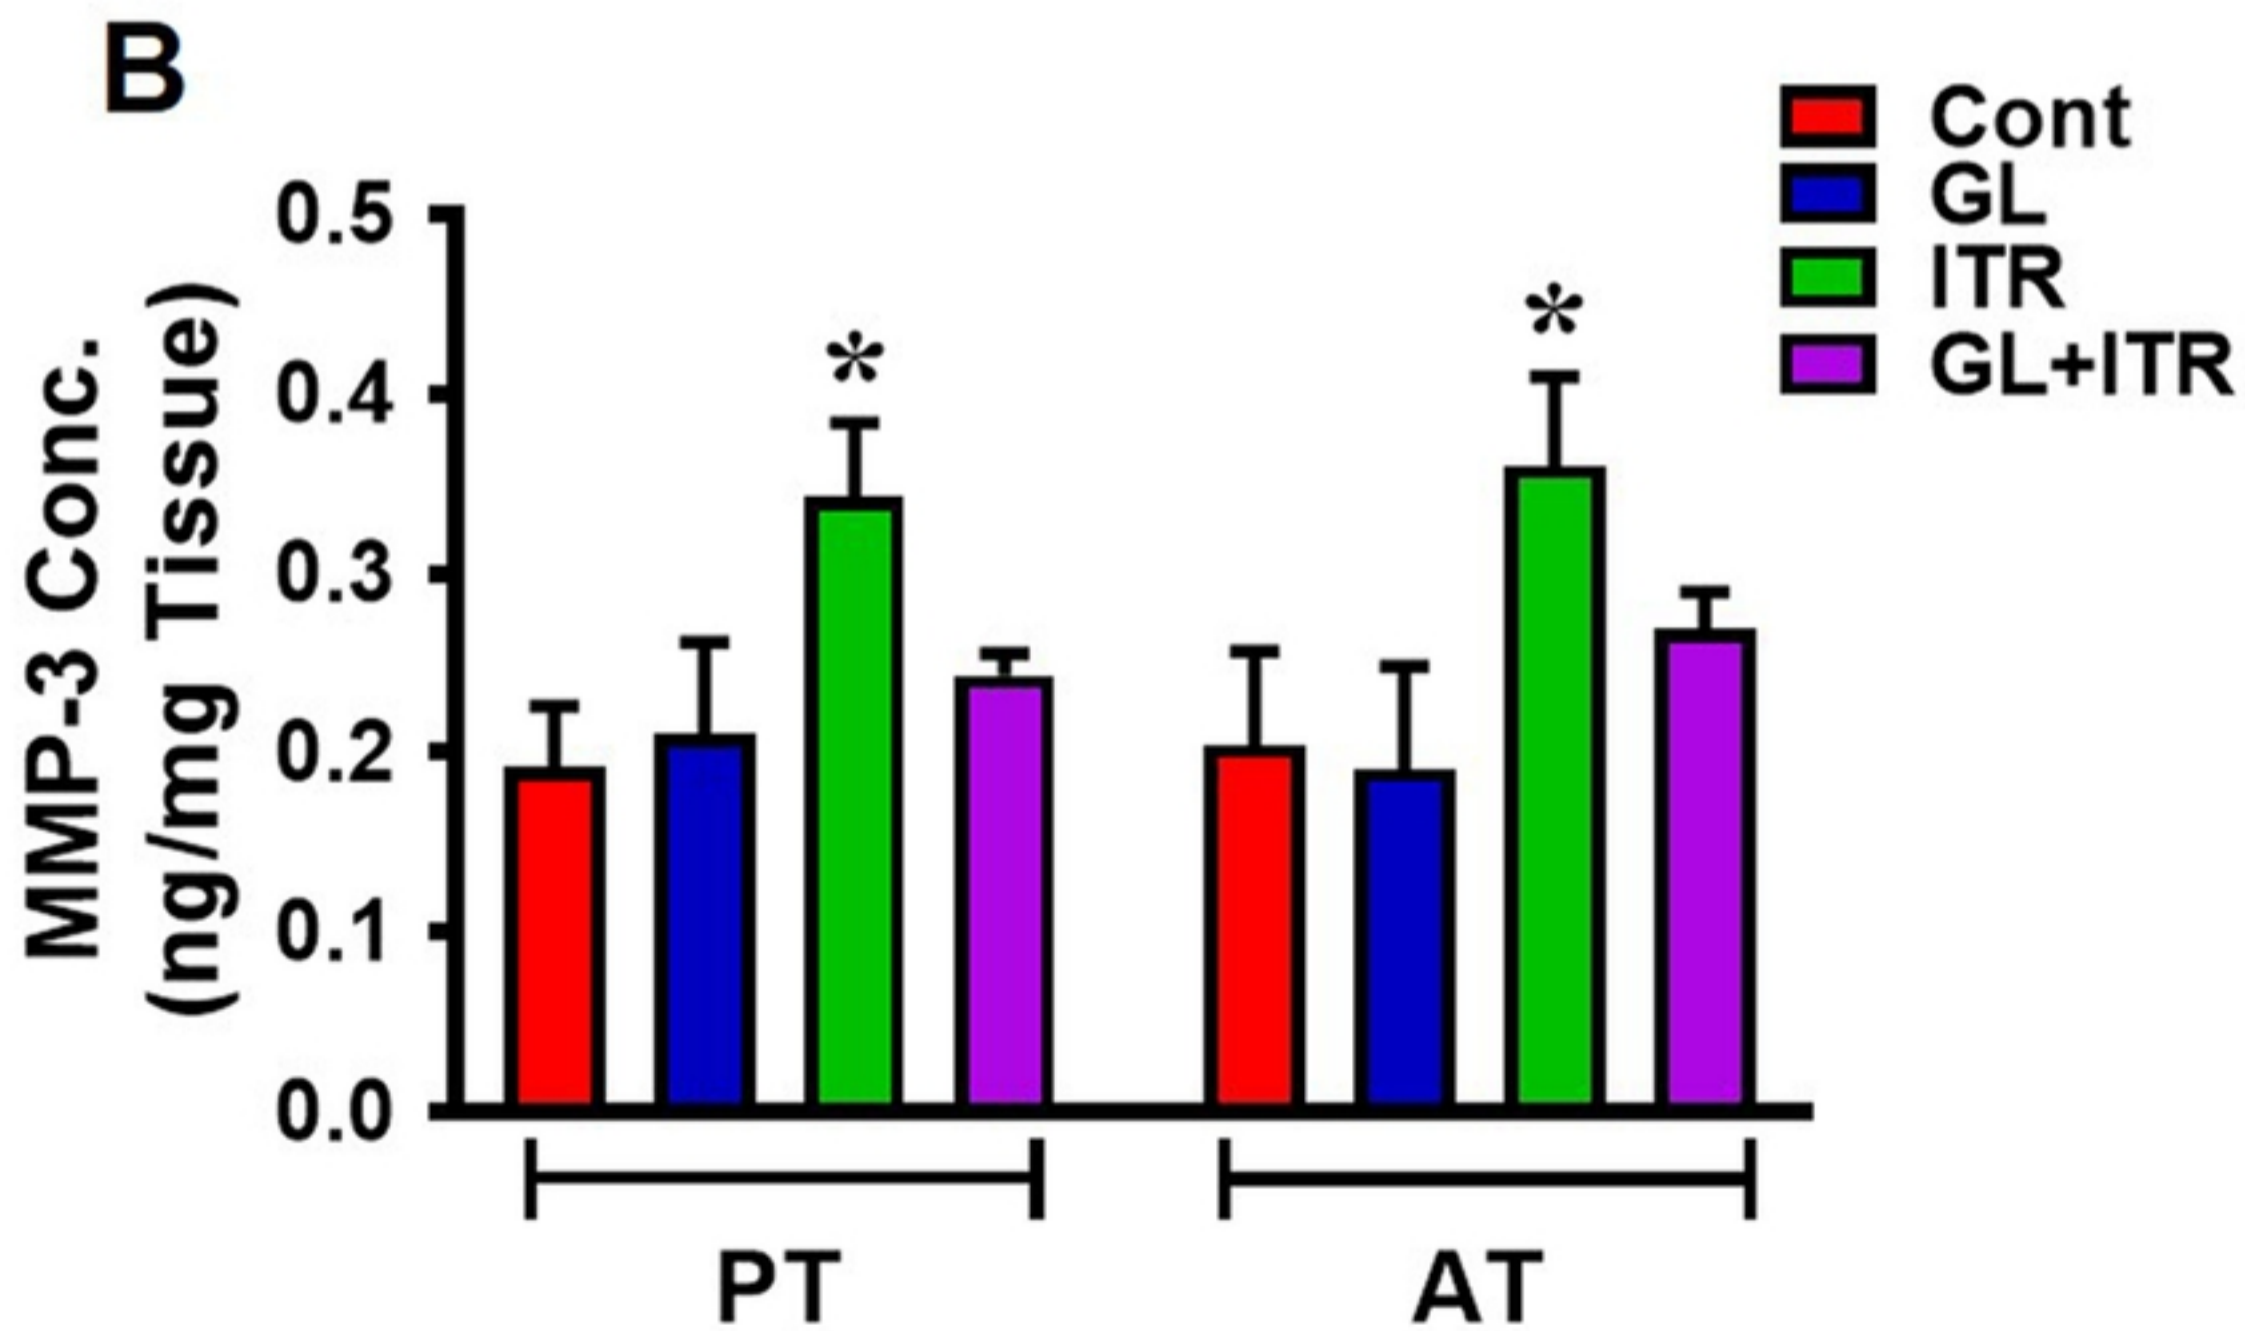

Figure

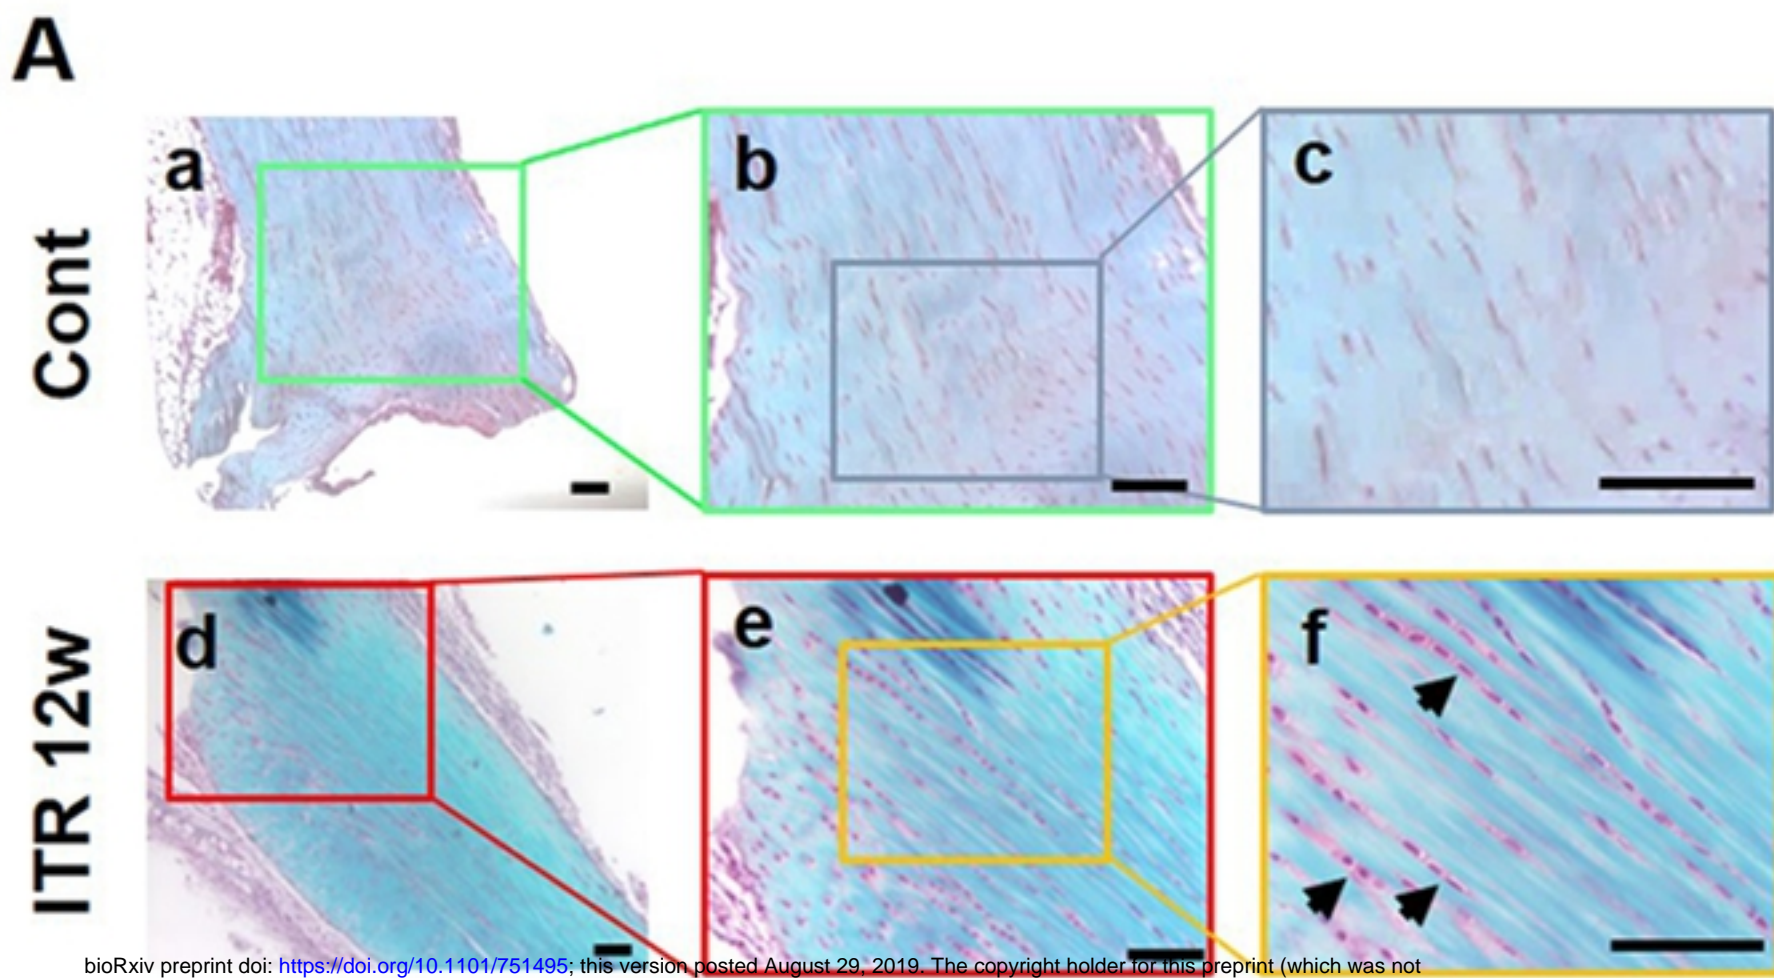

bioRxiv preprint doi: <https://doi.org/10.1101/751495>; this version posted August 29, 2019. The copyright holder for this preprint (which was not certified by peer review) is the author/funder, who has granted bioRxiv a license to display the preprint in perpetuity. It is made available under aCC-BY 4.0 International license.

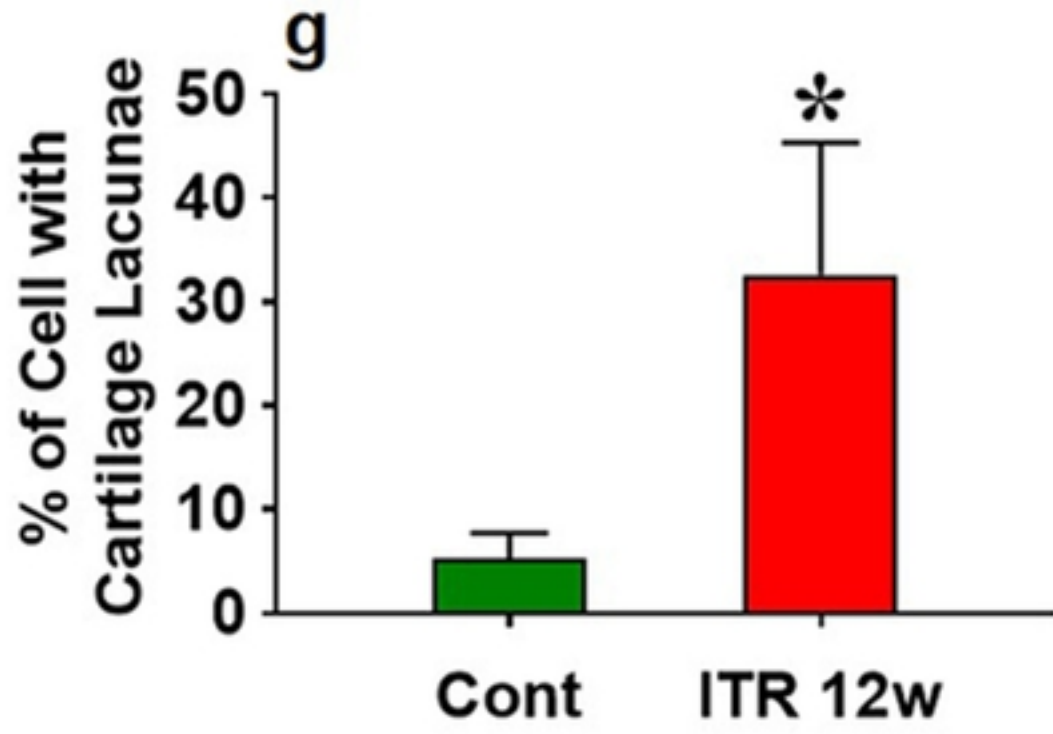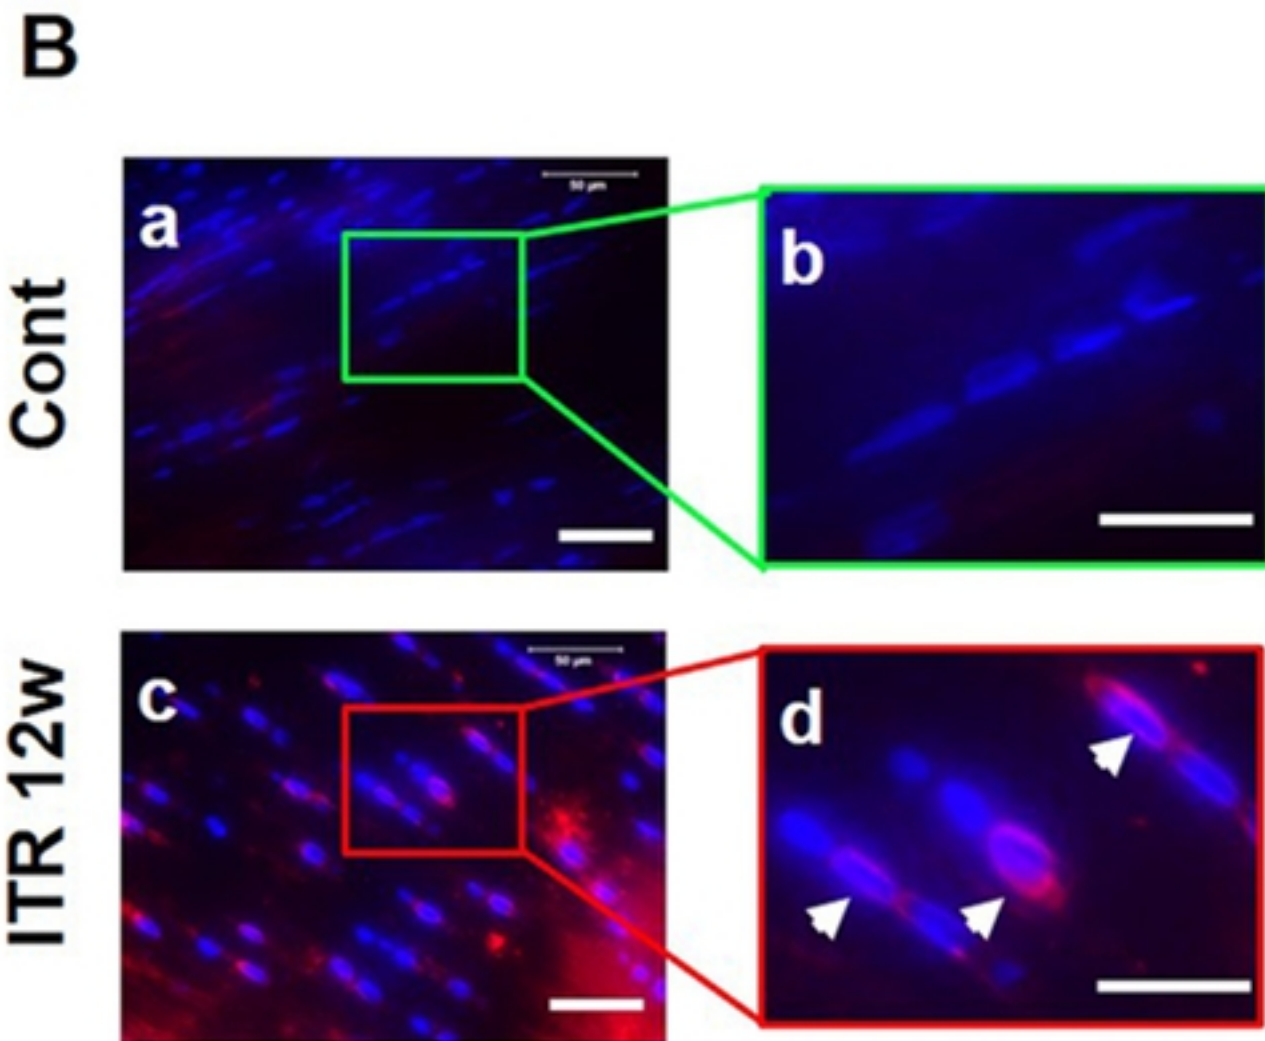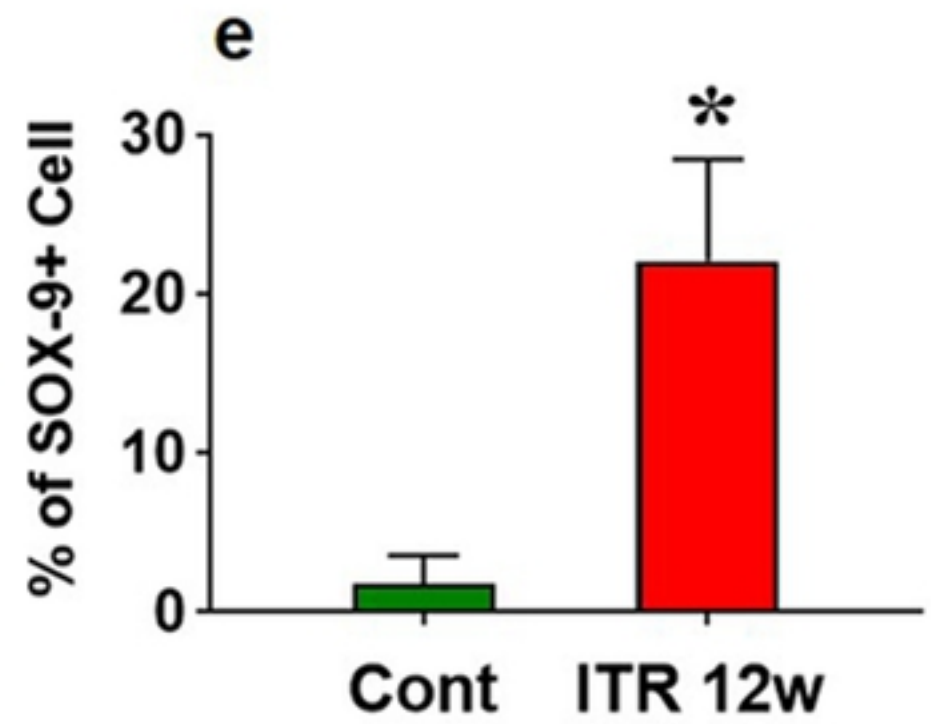

Figure

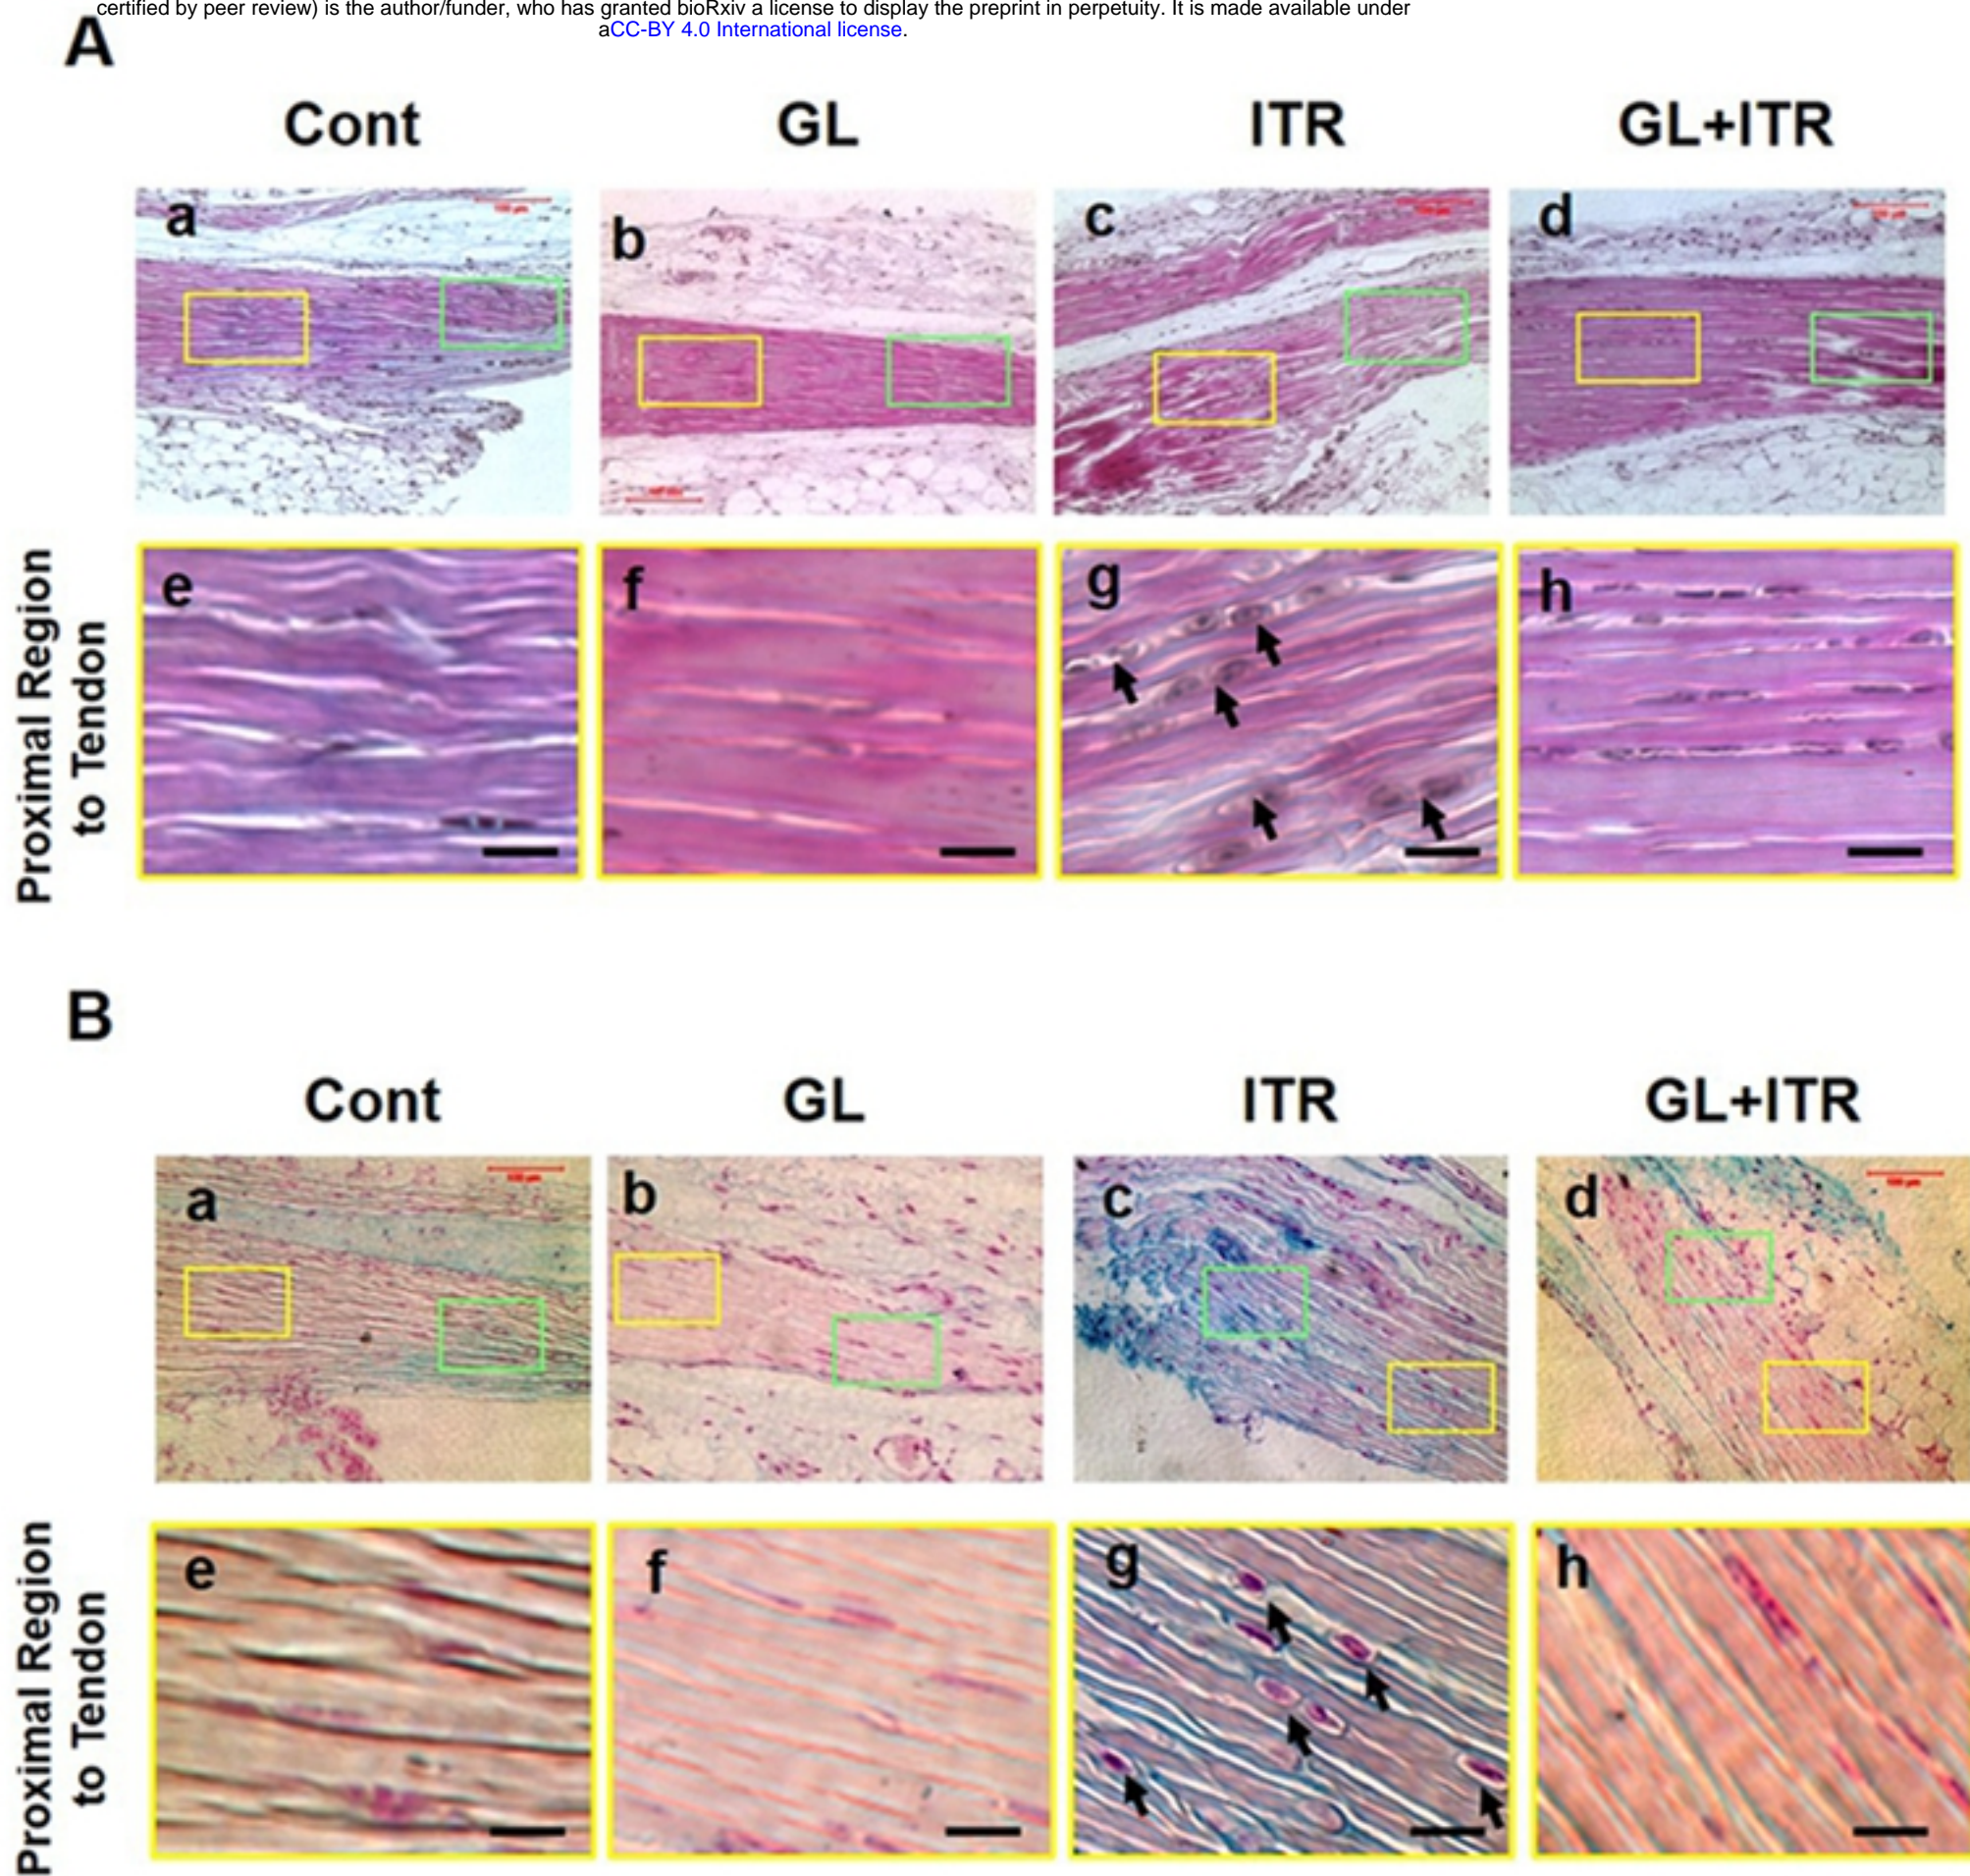

Figure



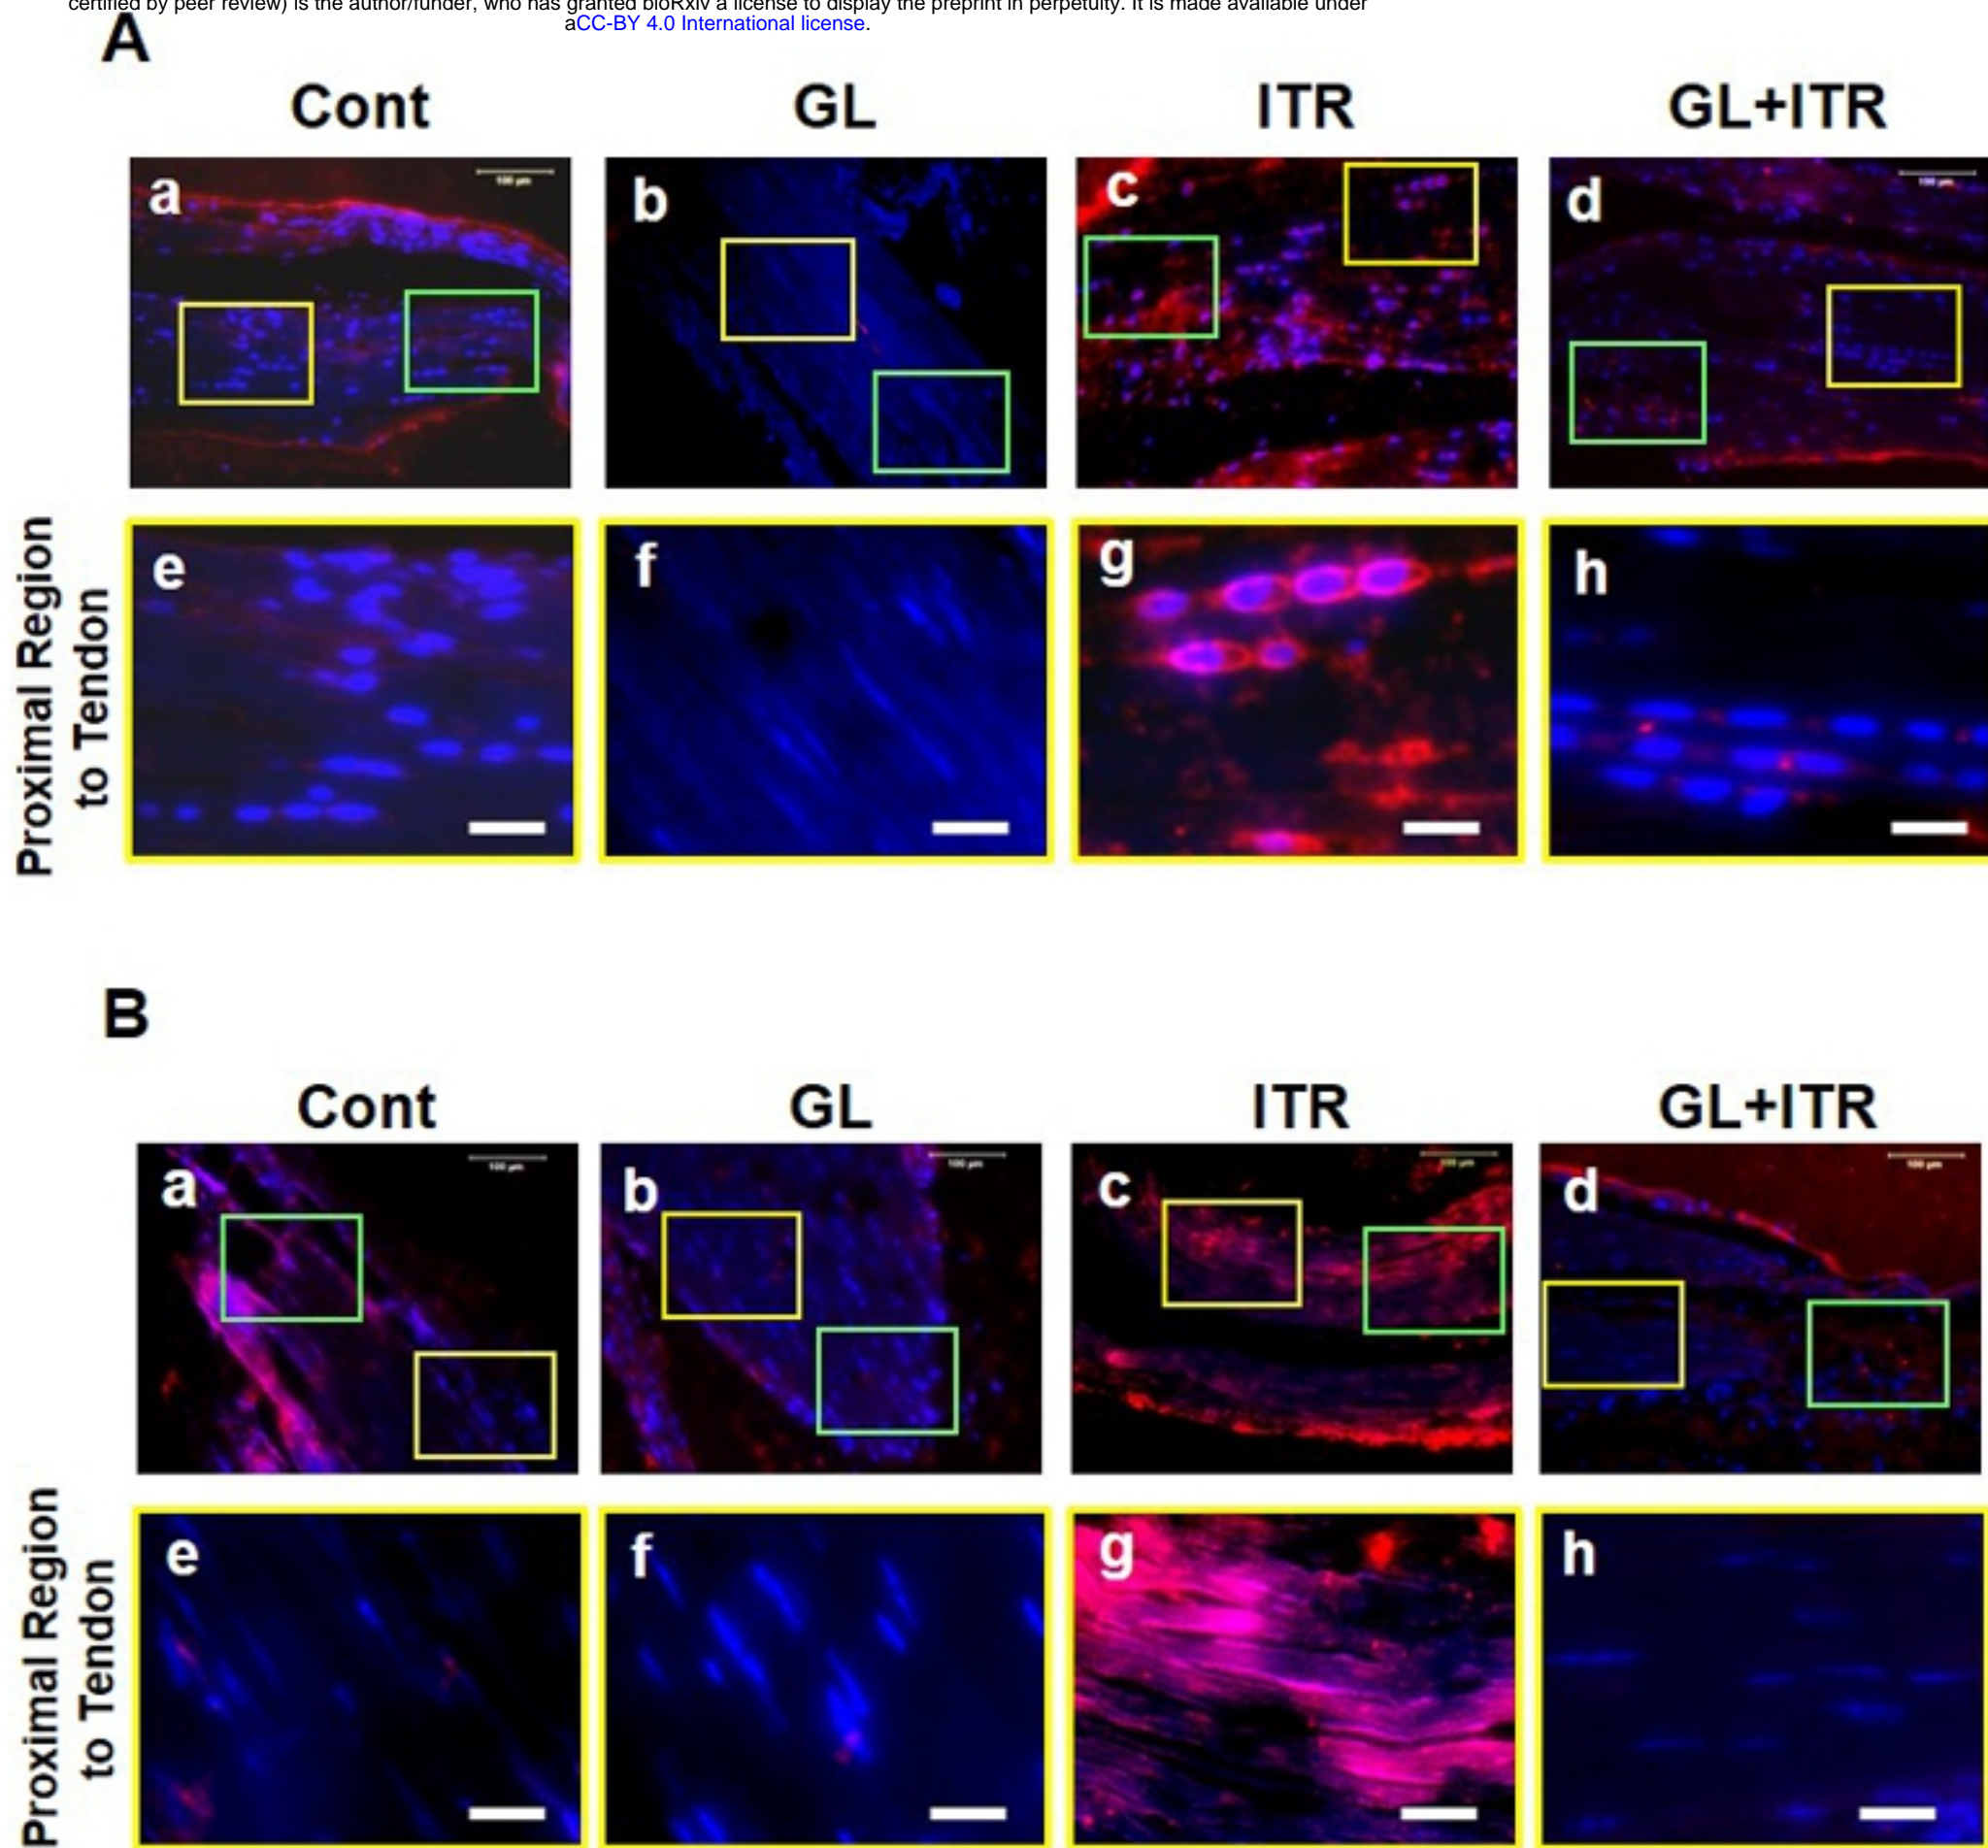

Figure
